# Supplementary material
Source: PubMed Central journal article supplement (PMC6521726)
Supplement: NIHMS1502930-supplement-16.pdf [file NIHMS1502930-supplement-16.pdf]

## Supplementary Note

### 1. Supplementary Results

#### *Competitive Gene-Set (Pathway) and Tissue Expression Analyses*

We used Multi-marker Analysis of GenoMic Annotation (MAGMA)<sup>1</sup> as implemented in the FUMA<sup>2</sup> pipeline to perform a competitive gene-set analysis of curated gene-sets and GO terms (pathways) obtained from the Molecular Signature Database<sup>3</sup>, as well as a gene-property analysis for gene expression of GTEx<sup>4</sup> tissues for LDL-C, triglycerides, and HDL-C. As expected, our pathway analysis revealed a significant enrichment for several biological processes related to lipoprotein metabolism including sterol homeostasis, acylglycerol homeostasis, chylomicron mediated transport, acyl reverse cholesterol transport, and regulation of lipoprotein lipase activity (P Bonferroni < 0.05, **Supplementary Table 24-29**). MAGMA gene-property analysis revealed a significant enrichment of GWAS signal overlapping genes expressed in the liver, adrenal gland, and the ovary for LDL-C, subcutaneous and visceral adipose tissue, liver, adrenal gland, and pancreas for triglycerides, and liver for HDL-C (**Supplementary Fig. 12-17**).

#### *Novel Lipid Loci and Association with Coronary Disease*

To further evaluate whether novel lipid variants identified in our analysis also influence the risk of CAD, we examined the association of lead variants within the 118 novel lipid loci identified in our study with coronary artery disease (CAD). 115/118 of the lead variants were present in the CARDIoGRAMplusC4D 1000 Genomes GWAS<sup>5</sup>; the remaining 3 (MAF < 0.0035 for each) were present in the MIGen and CARDIoGRAM exome chip GWAS analysis<sup>6</sup>. In total, 25 of the 118 loci showed at least nominal (P < 0.05) association with CAD in the CARDIoGRAM studies (**Supplementary Table 30**). Notably, the previously identified lead locus for CAD at 9p21 (rs1333048, CAD P =  $5.7 \times 10^{-94}$ ) is also associated with LDL-C and TC at genome-wide significance in our study. However, the LDL-C raising allele is in the opposite direction of the expected effect on CAD, suggesting that the causal variant(s) at 9p21 may confer CAD risk outside of a lipid pathway as implied by preliminary functional work at the locus<sup>7</sup>. We then examined the direction of effect for LDL-C, TG, and HDL-C raising alleles on CAD for the 118 novel loci in our analysis. Consistent with prior observations, the 32 LDL-C and 63 TG raising alleles (lipid P <  $10^{-4}$ ) were more likely to be associated with an increased risk of CAD (two-tailed binomial P = 0.05 and  $3.8 \times 10^{-5}$  for LDL and TG, respectively). The same was not true for 9 alleles associated with a higher HDL-C (P <  $10^{-4}$ ) but not also associated with LDL-C or TG (two-tailed binomial P = 0.5).

### 2. Supplementary Methods

#### *Quality Control Analysis*

We excluded: duplicate samples, samples with more heterozygosity than expected, an excess (>2.5%) of missing genotype calls, or discordance between genetically inferred sex and phenotypic gender. In addition, one individual from each pair of related individuals (as measured by the KING<sup>8</sup> software) were removed. Veterans were then divided into three mutually exclusive ethnic groups based on self-identified race/ethnicity and admixture analysis using the ADMIXTURE v1.3 software<sup>9</sup>: 1) non-Hispanic whites (self identified as “non-Hispanic,” “white,” and > 80% genetic European ancestry), 2) non-Hispanic blacks (self identified as “non-Hispanic,” “black,” and > 50% genetic African ancestry), and 3) Hispanics (self-identified only). ADMIXTURE plots for black and Hispanic veterans are provided in **Supplementary Figures 1 and 2**. Prior to imputation,

variants that were poorly called (genotype missingness > 5%) or that deviated from their expected allele frequency based on reference data from the 1000 Genomes Project<sup>10</sup> were excluded. In addition, samples with individual missingness > 2.5% were also excluded. After pre-phasing using EAGLE<sup>11</sup> v2, genotypes from the 1000 Genomes Project<sup>10</sup> phase 3, version 5 reference panel were imputed into Million Veteran Program (MVP) participants via Minimac3 software<sup>12</sup>. Ethnicity-specific principal component analysis was performed using the EIGENSOFT software<sup>13</sup>.

Following imputation, variant level quality control was performed using the EasyQC R package<sup>14</sup> (see URLs), and exclusion metrics included: ancestry specific Hardy-Weinberg equilibrium<sup>15</sup>  $P < 1 \times 10^{-20}$ , posterior call probability < 0.9, imputation quality/INFO < 0.3, minor allele frequency (MAF) < 0.0003, call rate < 97.5% for common variants (MAF > 1%), and call rate < 99% for rare variants (MAF < 1%). Variants were also excluded if they deviated > 10% from their expected allele frequency based on reference data from the 1000 Genomes Project<sup>10</sup>.

### *Lipid Phenotypes Quality Control and Transformation*

Following extraction of prevalent laboratory measurements from the electronic health record, lipid data were evaluated for spurious values (< 0 mg/dL), histograms for each lipid trait were inspected for normality, and extreme outliers (>400 mg/dL, > 1000 mg/dL, > 500 mg/dL, and > 150 mg/dL for low-density lipoprotein cholesterol (LDL-C), triglycerides, total cholesterol, and high-density lipoprotein cholesterol (HDL-C), respectively) were excluded (triglycerides were evaluated based on raw values and then following natural log transformation). For each phenotype: maximum LDL-C, natural log transformed maximum triglycerides, maximum total cholesterol, and minimum HDL-C, residuals were obtained after regressing on age, age<sup>2</sup>, sex, and 10 principal components within each ethnic group. Residuals were subsequently inverse normal transformed for association analysis. To minimize confounding from statins and variable adherence, maximum/minimum values were used<sup>16</sup>.

### *Discovery and Replication Association Analysis*

We tested DNA sequence variants for association with the transformed lipid values through linear regression assuming an additive model using the SNPTEST (see URLs) statistical software program. In our discovery analysis, we performed association analyses separately for each ethnic group (whites, blacks, and Hispanics) and then meta-analyzed using an inverse variance-weighted fixed effects method implemented in the METAL software program<sup>17</sup>. We excluded variants with a high amount of heterogeneity ( $I^2$  statistic > 75%) across the three ancestries. In addition, we required that variants be observed in at least two ethnic groups. For variants with suggestive associations (association  $P < 10^{-4}$ ), we sought replication of our findings in one of two independent studies.

Replication was first performed using summary statistics from the 2017 Global Lipids Genetics Consortium (GLGC) exome array meta-analysis<sup>18</sup>. In this analysis, 73 studies encompassing up to 319,677 participants contributed association results for plasma lipid levels using genotypes from the HumanExome BeadChip (or exome array). For each phenotype (LDL-C, natural log transformed triglycerides, total cholesterol, and HDL-C), residuals were obtained after regressing on age, age<sup>2</sup>, sex, and 4 principal components of ancestry. For studies with data collected after 1994, adjustments to LDL-C and total cholesterol measurements were made (LDL-C/0.7, total cholesterol/0.8) for individuals on lipid lowering medication. No adjustment was made for HDL-C or triglycerides. For studies ascertained on CAD case/control status, the two groups were modeled as separate studies. A total of 242,289 variants were analyzed after quality control and were available for replication.

If a DNA sequence variant was not available for replication in the above exome array-focused study, we sought replication from publicly available summary statistics from the 2013 GLGC “joint meta-analysis<sup>19</sup>.” In this analysis, 37 studies of primarily European ancestry genotyped on various arrays and imputed to the HapMap<sup>20</sup> reference panel contributed association results and were meta-analyzed. An additional 2,044,165 variants were available for replication in this study. Association results for variants present in both the 2017 exome array-focused study and the 2013 “joint meta-analysis” were tested for replication only in the exome chip dataset.

We combined results across discovery and replication cohorts using inverse-variance weighted fixed effects meta-analysis. A  $P < 0.05$  with a consistent direction of effect was required for replication, and we set an overall (discovery and replication combined) statistical threshold of  $P < 5 \times 10^{-8}$  for genome-wide significance. Novel loci were defined as being greater than 1 million base-pairs away from a known lipid genome-wide associated lead variant. Additionally, linkage disequilibrium information from the 1000 Genomes Project<sup>10</sup> was used to determine independent variants where a locus extended beyond 1 million base-pairs. All association  $P$  values were two-sided.

#### *Competitive Gene-Set (Pathway) and Tissue Expression Analysis*

We used MAGMA<sup>1</sup> as implemented in the FUMA<sup>2</sup> (see URLs) pipeline to perform a competitive gene set analysis for 10,655 gene sets (curated gene sets: 4,738, GO terms: 5,917) present in the Molecular Signature Database<sup>3</sup> (MsigDB 6.1) and a gene-property analysis for gene expression in GTEx v7 with 53 tissue types. The input for these analyses was our 1000 Genomes<sup>10</sup> imputed summary statistics from Stage 1 for LDL-C, triglycerides, and HDL-C. We first ran the combined trans-ethnic summary statistics and then the summary statistics in the European subgroup of participants alone. For the gene-set analyses, a  $P$  adjusted for the number of total gene sets tested was calculated and output for gene-sets with two-sided  $P$  Bonferroni  $< 0.05$ . We note that MAGMA gene-set and gene-property analyses uses the full distribution of SNP  $p$  values and differs from pathway enrichment tests that only tests for enrichment of prioritized genes.

#### *Cohort Descriptions and Coronary Artery Disease Definitions for PDE3B Analysis*

We sought replication of our *PDE3B* pLoF lipid findings in the DiscovEHR cohort. In this study, median values for serially measured laboratory traits were calculated for all individuals with two or more measurements in the EHR following removal of likely spurious values that were greater than three standard deviations from the intra-individual median value. All measurements were taken after fasting and were adjusted for known lipid-lowering medication use (total cholesterol divided by 0.8; LDL-C divided by 0.7; triglycerides divided by 0.83; and HDL-C divided by 1.04 for individuals on lipid lowering medications). HDL-C and triglycerides measurements were log<sub>10</sub>-transformed to achieve normality. Residuals were generated for each trait, adjusting for age, age<sup>2</sup>, sex, and the first four principal components of ancestry and then rank-based inverse normalized residuals were tested for association with variants using linear regression, under an additive model. MVP and DiscovEHR lipid results were combined using an inverse variance-weighted fixed effects method.

We then examined the effect of damaging and pLoF mutations in Phosphodiesterase 3B on the risk of coronary artery disease across five cohorts. We performed logistic regression of rs150090666 or associated damaging mutations with coronary artery disease adjusted for age, sex, and the first 5 principal components of ancestry across white participants.

In MVP, coronary disease cases and controls were defined after collapsing ICD-9 diagnosis codes to the “Ischemic Heart Disease” phenotype based on the algorithm proposed by Denny et al<sup>21</sup>. Phenotype quality

control was performed as described in the PheWAS methods below. We identified 50,950 coronary artery disease cases and 111,584 controls available for analysis.

In UK Biobank, analysis was performed separately in individuals of European and non-European ancestry. Phasing and imputation were performed centrally, by UK Biobank, using a reference panel combining UK10K and 1000 Genomes samples. 39,235,157 variants included in the Haplotype Reference Consortium<sup>22</sup> were imputed. As recommended by UK Biobank, we excluded any samples with an imputation quality < 0.3 as well as pLoF variants which were not included in the Haplotype Reference Consortium reference panel. Mitochondrial genetic data and sex chromosomes were excluded from this analysis. Individual level genetic data was available from individuals in UK Biobank, after excluding one related individual of each related pair of individuals, individuals whose genetic sex did not match self-reported sex, and individuals with an excess of missing genotype calls or more heterozygosity than expected.

Estimates of the association of rs150090666 with coronary artery disease in UK Biobank were derived using logistic regression with adjustment for age, sex, ten principal components of ancestry and a dummy variable for array type. Coronary artery disease diagnosis was defined as previously described<sup>23</sup>.

In the Myocardial Genetics Consortium, whole-exome sequencing of the Myocardial Infarction Genetics Consortium participants was performed between 2010 and 2015 at the Broad Institute as previously described<sup>24</sup>. In brief, sequence data of all participants were aligned to a human reference genome build GRCh37.p13 using the Burrows-Wheeler Aligner algorithm. Aligned non-duplicate reads were locally realigned and base qualities were recalibrated using Genome Analysis Toolkit (GATK) software<sup>25</sup>. Variants were jointly called using GATK HaplotypeCaller software. The sensitivity of the selected variant quality score recalibration threshold was 99.6% for single-nucleotide polymorphisms and 95% for insertion or deletion variants as empirically assessed using HapMap controls with known genotypes included in the genotyping call set.

pLoF and damaging variants in *PDE3B* were identified in the Myocardial Infarction Genetics Consortium using whole-exome sequencing as previously described<sup>24,26,27</sup>. Studies included in the consortium were: 1) the Italian Atherosclerosis Thrombosis and Vascular Biology (ATVB) study (dbGaP Study Accession phs000814.v1.p1); 2) the Exome Sequencing Project Early-Onset Myocardial Infarction (ESP-EOMI) study; 3) a nested case-control cohort from the Jackson Heart Study (JHS); 4) the South German Myocardial Infarction study (dbGaP Study Accession phs000916.v1.p1); 5) the Ottawa Heart Study (OHS) (dbGaP Study Accession phs000806.v1.p1); 6) the Precocious Coronary Artery Disease (PROCARDIS) study (dbGaP Study Accession phs000883.v1.p1); 7) the Pakistan Risk of Myocardial Infarction Study (PROMIS) (dbGaP Study Accession phs000917.v1.p1); 8) the Registre Gironi del COR (Gerona Heart Registry or REGICOR) study (dbGaP Study Accession phs000902.v1.p1); 9) the Leicester Myocardial Infarction study (dbGaP Study Accession phs001000.v1.p1); 10) the BioImage study (dbGaP Study Accession phs001058.v1.p1); 11) the North German Myocardial Infarction study (dbGaP Study Accession phs000990.v1.p1); 12) the Bangladesh Risk of Acute Vascular Events (BRAVE) study. A total of 47 putative loss of function variants and nonsynonymous variants predicted to be damaging or possibly damaging by each of 5 computer prediction algorithms (LRT score, MutationTaster, PolyPhen-2, HumDiv, PolyPhen-2 HumVar, and SIFT) with a minor allele frequency < 0.01 were aggregated together for phenotypic analysis.

In Penn Medicine Biobank, genomic DNA samples were transferred to the Regeneron Genetics Center for whole exome sequencing. Sequence reads were aligned to the human reference build GRCh37.p13. Single-nucleotide variants and insertion–deletion (indel) sequence variants were identified with the use of GATK. GATK was used to conduct local realignment of the aligned, duplicate-marked reads of each sample around putative indels. GATK's HaplotypeCaller was then used to process the indel-realigned, duplicate-marked reads to identify all exonic positions at which a sample varied from the genome reference in the genomic VCF

format. Variant Quality Score Recalibration, from GATK, was employed to evaluate the overall quality score of a sample's variants using training datasets (e.g., 1000 Genomes) to assess and recalculate each variant's score.

Following completion of cohort sequencing, samples showing disagreement between genetically-determined and reported sex, high rates of heterozygosity, low sequence coverage, unusually high degrees of cryptic relatedness, or genetically-identified sample duplicates, were excluded. For the purposes of downstream analyses, biallelic variants with missingness rates < 1%, Hardy-Weinberg equilibrium P values >  $1.0 \times 10^{-6}$  were retained. Coronary artery disease cases were defined as previously described<sup>28</sup>. Following these exclusions, 7,606 exome sequences of European ancestry were available for downstream analysis. A total of 34 putative loss of function variants and nonsynonymous variants predicted to be damaging or possibly damaging by each of 5 computer prediction algorithms were aggregated together for phenotypic analysis.

In DiscovEHR, samples, DNA sequence variants, and coronary disease cases were defined as previously described<sup>28</sup>. A total of 44 putative loss of function variants and nonsynonymous variants predicted to be damaging or possibly damaging by each of 5 computer prediction algorithms with a minor allele frequency < 0.01 were aggregated together for phenotypic analysis. Variants were tested for association with coronary disease status using Firth's penalized logistic regression, under an additive model, including age, age<sup>2</sup>, sex, and the first four principal components of ancestry as covariates.

#### *Novel Lipid Loci and Association with Coronary Disease*

To assess whether novel lipid loci in our study modulate the risk of coronary disease, we extracted association results for the lead variant at each locus from either the CARDIoGRAMplusC4D 1000 Genomes imputed GWAS<sup>5</sup> (115/118 variants) or from the MIGen and CARDIoGRAM exome chip GWAS analysis<sup>6</sup> for 3 variants not available in the former. A two-tailed exact binomial test for goodness of fit was performed examining the expected and observed distributions of 1) LDL-C and 2) TG raising alleles ( $P < 10^{-4}$ ), and 3) HDL-C raising alleles ( $P < 10^{-4}$ ) not also associated with LDL-C or TG ( $P > 0.05$ ) and their effect on coronary artery disease risk. We tested the null hypothesis that the lipid-associated variants were equally likely to increase or decrease coronary disease risk and set a two-sided  $P < 0.05$  threshold for statistical significance.

#### *PheWAS of Quality Control, Disease Definitions, and Association Analysis*

Of 353,323 genotyped veterans, participants were included in the PheWAS analysis if the electronic health record reflected 2 or more separate encounters in the VA Healthcare System in each of the two years prior to enrollment in MVP. We identified 277,531 total veterans spanning 21,209,658 prevalent ICD-9 diagnosis codes available for analysis. We focused on the largest subgroup of 176,913 white participants, in which the mean age was  $64.9 \pm 12.6$  years, and 93.1% (164,767) were male.

ICD-9 diagnosis codes were collapsed to clinical disease groups and corresponding controls using the groupings proposed by Denny et al<sup>21</sup>. Diseases were required to have a prevalence of > 0.25% (~400 cases) to be included in the PheWAS analysis. Each of two nonsense (*LPL* p.Ser474Ter, *ANGPTL8* p.Gln121Ter) and three missense (*ANGPTL4* p.Glu40Lys, *APOA5* p.Ser19Trp, *PCSK9* p.Arg46Leu) DNA sequence variants were tested using logistic regression adjusting for age, sex, and five principal components under the assumption of additive effects using the PheWAS R package in R v3.2.0 (see URLs). In total, 1,004 disease phenotypes were available for analysis.

## Supplementary Note References

1. de Leeuw, C.A., Mooij, J.M., Heskes, T. & Posthuma, D. MAGMA: generalized gene-set analysis of GWAS data. *PLoS Comput Biol* **11**, e1004219 (2015).
2. Watanabe, K., Taskesen, E., van Bochoven, A. & Posthuma, D. Functional mapping and annotation of genetic associations with FUMA. *Nat Commun* **8**, 1826 (2017).
3. Subramanian, A. *et al.* Gene set enrichment analysis: a knowledge-based approach for interpreting genome-wide expression profiles. *Proc Natl Acad Sci U S A* **102**, 15545-50 (2005).
4. GTEx Consortium. Genetic effects on gene expression across human tissues. *Nature* **550**, 204-213 (2017).
5. CARDIoGRAMplusC4D Consortium. A comprehensive 1000 Genomes-based genome-wide association meta-analysis of coronary artery disease. *Nat Genet* **47**, 1121-30 (2015).
6. Webb, T.R. *et al.* Systematic Evaluation of Pleiotropy Identifies 6 Further Loci Associated With Coronary Artery Disease. *J Am Coll Cardiol* **69**, 823-836 (2017).
7. Harismendy, O. *et al.* 9p21 DNA variants associated with coronary artery disease impair interferon-gamma signalling response. *Nature* **470**, 264-8 (2011).
8. Manichaikul, A. *et al.* Robust relationship inference in genome-wide association studies. *Bioinformatics* **26**, 2867-73 (2010).
9. Alexander, D.H., Novembre, J. & Lange, K. Fast model-based estimation of ancestry in unrelated individuals. *Genome Res* **19**, 1655-64 (2009).
10. The 1000 Genomes Project Consortium. A global reference for human genetic variation. *Nature* **526**, 68-74 (2015).
11. Loh, P.R., Palamara, P.F. & Price, A.L. Fast and accurate long-range phasing in a UK Biobank cohort. *Nat Genet* **48**, 811-6 (2016).
12. Howie, B., Fuchsberger, C., Stephens, M., Marchini, J. & Abecasis, G.R. Fast and accurate genotype imputation in genome-wide association studies through pre-phasing. *Nat Genet* **44**, 955-9 (2012).
13. Price, A.L. *et al.* Principal components analysis corrects for stratification in genome-wide association studies. *Nat Genet* **38**, 904-9 (2006).
14. Winkler, T.W. *et al.* Quality control and conduct of genome-wide association meta-analyses. *Nat Protoc* **9**, 1192-212 (2014).
15. Hyde, C.L. *et al.* Identification of 15 genetic loci associated with risk of major depression in individuals of European descent. *Nat Genet* **48**, 1031-6 (2016).

16. Abul-Husn, N.S. *et al.* Genetic identification of familial hypercholesterolemia within a single U.S. health care system. *Science* **354**(2016).
17. Willer, C.J., Li, Y. & Abecasis, G.R. METAL: fast and efficient meta-analysis of genomewide association scans. *Bioinformatics* **26**, 2190-1 (2010).
18. Liu, D.J. *et al.* Exome-wide association study of plasma lipids in >300,000 individuals. *Nat Genet* (2017).
19. Global Lipids Genetics Consortium *et al.* Discovery and refinement of loci associated with lipid levels. *Nat Genet* **45**, 1274-83 (2013).
20. Frazer, K.A. *et al.* A second generation human haplotype map of over 3.1 million SNPs. *Nature* **449**, 851-61 (2007).
21. Denny, J.C. *et al.* Systematic comparison of phenome-wide association study of electronic medical record data and genome-wide association study data. *Nat Biotechnol* **31**, 1102-10 (2013).
22. McCarthy, S. *et al.* A reference panel of 64,976 haplotypes for genotype imputation. *Nat Genet* **48**, 1279-83 (2016).
23. Klarin, D. *et al.* Genetic analysis in UK Biobank links insulin resistance and transendothelial migration pathways to coronary artery disease. *Nat Genet* (2017).
24. Do, R. *et al.* Exome sequencing identifies rare LDLR and APOA5 alleles conferring risk for myocardial infarction. *Nature* **518**, 102-6 (2015).
25. McKenna, A. *et al.* The Genome Analysis Toolkit: a MapReduce framework for analyzing next-generation DNA sequencing data. *Genome Res* **20**, 1297-303 (2010).
26. Khera, A.V. *et al.* Diagnostic Yield of Sequencing Familial Hypercholesterolemia Genes in Patients with Severe Hypercholesterolemia. *J Am Coll Cardiol* (2016).
27. Khera, A.V. *et al.* Association of Rare and Common Variation in the Lipoprotein Lipase Gene With Coronary Artery Disease. *JAMA* **317**, 937-946 (2017).
28. Dewey, F.E. *et al.* Genetic and Pharmacologic Inactivation of ANGPTL3 and Cardiovascular Disease. *N Engl J Med* (2017).

## **Million Veteran Program Consortium**

### **MVP Executive Committee**

- Co-Chair: J. Michael Gaziano, M.D., M.P.H.
- Co-Chair: Rachel Ramoni, D.M.D., Sc.D.
- Jim Breeling, M.D. (ex-officio)
- Kyong-Mi Chang, M.D.
- Grant Huang, Ph.D.
- Sumitra Muralidhar, Ph.D.
- Christopher J. O'Donnell, M.D., M.P.H.
- Philip S. Tsao, Ph.D.

### **MVP Program Office**

- Sumitra Muralidhar, Ph.D.
- Jennifer Moser, Ph.D.

### **MVP Recruitment/Enrollment**

- Recruitment/Enrollment Director/Deputy Director, Boston – Stacey B. Whitbourne, Ph.D.; Jessica V. Brewer, M.P.H.
- MVP Coordinating Centers
  - o Clinical Epidemiology Research Center (CERC), West Haven – John Concato, M.D., M.P.H.
  - o Cooperative Studies Program Clinical Research Pharmacy Coordinating Center, Albuquerque - Stuart Warren, J.D., Pharm D.; Dean P. Argyres, M.S.
  - o Genomics Coordinating Center, Palo Alto – Philip S. Tsao, Ph.D.
  - o Massachusetts Veterans Epidemiology Research Information Center (MAVERIC), Boston - J. Michael Gaziano, M.D., M.P.H.
  - o MVP Information Center, Canandaigua – Brady Stephens, M.S.
- Core Biorepository, Boston – Mary T. Brophy M.D., M.P.H.; Donald E. Humphries, Ph.D.
- MVP Informatics, Boston – Nhan Do, M.D.; Shahpoor Shayan
- Data Operations/Analytics, Boston – Xuan-Mai T. Nguyen, Ph.D.

### **MVP Science**

- Genomics - Christopher J. O'Donnell, M.D., M.P.H.; Saiju Pyarajan Ph.D.; Philip S. Tsao, Ph.D.



- Phenomics - Kelly Cho, M.P.H, Ph.D.
- Data and Computational Sciences – Saiju Pyarajan, Ph.D.
- Statistical Genetics – Elizabeth Hauser, Ph.D.; Yan Sun, Ph.D.; Hongyu Zhao, Ph.D.

#### **MVP Local Site Investigators**

- Atlanta VA Medical Center (Peter Wilson)
- Bay Pines VA Healthcare System (Rachel McArdle)
- Birmingham VA Medical Center (Louis Dellitalia)
- Cincinnati VA Medical Center (John Harley)
- Clement J. Zablocki VA Medical Center (Jeffrey Whittle)
- Durham VA Medical Center (Jean Beckham)
- Edith Nourse Rogers Memorial Veterans Hospital (John Wells)
- Edward Hines, Jr. VA Medical Center (Salvador Gutierrez)
- Fayetteville VA Medical Center (Gretchen Gibson)
- VA Health Care Upstate New York (Laurence Kaminsky)
- New Mexico VA Health Care System (Gerardo Villareal)
- VA Boston Healthcare System (Scott Kinlay)
- VA Western New York Healthcare System (Junzhe Xu)
- Ralph H. Johnson VA Medical Center (Mark Hamner)
- Wm. Jennings Bryan Dorn VA Medical Center (Kathlyn Sue Haddock)
- VA North Texas Health Care System (Sujata Bhushan)
- Hampton VA Medical Center (Pran Iruvanti)
- Hunter Holmes McGuire VA Medical Center (Michael Godschalk)
- Iowa City VA Health Care System (Zuhair Ballas)
- Jack C. Montgomery VA Medical Center (Malcolm Buford)
- James A. Haley Veterans' Hospital (Stephen Mastorides)
- Louisville VA Medical Center (Jon Klein)
- Manchester VA Medical Center (Nora Ratcliffe)
- Miami VA Health Care System (Hermes Florez)
- Michael E. DeBakey VA Medical Center (Alan Swann)
- Minneapolis VA Health Care System (Maureen Murdoch)
- N. FL/S. GA Veterans Health System (Peruvemba Sriram)
- Northport VA Medical Center (Shing Shing Yeh)
- Overton Brooks VA Medical Center (Ronald Washburn)
- Philadelphia VA Medical Center (Darshana Jhala)
- Phoenix VA Health Care System (Samuel Aguayo)
- Portland VA Medical Center (David Cohen)
- Providence VA Medical Center (Satish Sharma)
- Richard Roudebush VA Medical Center (John Callaghan)

- Salem VA Medical Center (Kris Ann Oursler)
- San Francisco VA Health Care System (Mary Whooley)
- South Texas Veterans Health Care System (Sunil Ahuja)
- Southeast Louisiana Veterans Health Care System (Amparo Gutierrez)
- Southern Arizona VA Health Care System (Ronald Schifman)
- Sioux Falls VA Health Care System (Jennifer Greco)
- St. Louis VA Health Care System (Michael Rauchman)
- Syracuse VA Medical Center (Richard Servatius)
- VA Eastern Kansas Health Care System (Mary Oehlert)
- VA Greater Los Angeles Health Care System (Agnes Wallbom)
- VA Loma Linda Healthcare System (Ronald Fernando)
- VA Long Beach Healthcare System (Timothy Morgan)
- VA Maine Healthcare System (Todd Stapley)
- VA New York Harbor Healthcare System (Scott Sherman)
- VA Pacific Islands Health Care System (Gwenevere Anderson)
- VA Palo Alto Health Care System (Philip Tsao)
- VA Pittsburgh Health Care System (Elif Sonel)
- VA Puget Sound Health Care System (Edward Boyko)
- VA Salt Lake City Health Care System (Laurence Meyer)
- VA San Diego Healthcare System (Samir Gupta)
- VA Southern Nevada Healthcare System (Joseph Fayad)
- VA Tennessee Valley Healthcare System (Adriana Hung)
- Washington DC VA Medical Center (Jack Lichy)
- W.G. (Bill) Hefner VA Medical Center (Robin Hurley)
- White River Junction VA Medical Center (Brooks Robey)
- William S. Middleton Memorial Veterans Hospital (Robert Striker)

## Global Lipids Genetics Consortium Investigators

Dajiang J liu<sup>1</sup>, Gina M Peloso<sup>2,3</sup>, Haojie Yu<sup>4</sup>, Adam S Butterworth<sup>5,6</sup>, Xiao Wang<sup>7</sup>, Anubha Mahajan<sup>8</sup>, Danish Saleheen<sup>5,9,10</sup>, Connor Emdin<sup>3,11</sup>, Dewan Alam<sup>12</sup>, Alexessander Couto Alves<sup>13</sup>, Philippe Amouyel<sup>14</sup>, Emanuele Di Angelantonio<sup>5,6</sup>, Dominique Arveiler<sup>15</sup>, Themistocles L Assimes<sup>16,17</sup>, Paul L Auer<sup>18</sup>, Usman Baber<sup>19</sup>, Christie M Ballantyne<sup>20</sup>, Lia E Bang<sup>21</sup>, Marianne Benn<sup>22,23</sup>, Joshua C Bis<sup>24</sup>, Michael Boehnke<sup>25</sup>, Eric Boerwinkle<sup>26,27</sup>, Jette Bork-Jensen<sup>28</sup>, Erwin P Bottinger<sup>29</sup>, Ivan Brandslund<sup>30,31</sup>, Morris Brown<sup>32</sup>, Fabio Busonero<sup>33</sup>, Mark J Caulfield<sup>32,34,35</sup>, John C Chambers<sup>36-38</sup>, Daniel I Chasman<sup>39,40</sup>, Y Eugene Chen<sup>41</sup>, Yii-Der Ida chen<sup>42</sup>, Rajiv Chowdhury<sup>5</sup>, Cramer christensen<sup>43</sup>, Audrey Y chu<sup>39,44</sup>, John M Connell<sup>45</sup>, Francesco Cucca<sup>33,46</sup>, L Adrienne Cupples<sup>2,44</sup>, Scott M Damrauer<sup>47,48</sup>, Gail Davies<sup>49,50</sup>, Ian J Deary<sup>49,50</sup>, George Dedoussis<sup>51</sup>, Joshua C Denny<sup>52,53</sup>, Anna Dominiczak<sup>54</sup>, Marie-Pierre Dubé<sup>55-57</sup>, Tapani Ebeling<sup>58</sup>, Gudny Eiriksdottir<sup>59</sup>, Tõnu Esko<sup>3,60</sup>, Aliko-Eleni Farmaki<sup>51</sup>, Mary F Feitosa<sup>61</sup>, Marco Ferrario<sup>62</sup>, Jean Ferrieres<sup>63</sup>, Ian Ford<sup>64</sup>, Myriam Fornage<sup>65</sup>, Paul W Franks<sup>66-68</sup>, Timothy M Frayling<sup>69</sup>, Ruth Frikke-Schmidt<sup>22,23</sup>, Lars G Fritsche<sup>25</sup>, Philippe Frossard<sup>10</sup>, Valentin Fuster<sup>19,70</sup>, Santhi K Ganesh<sup>41,71</sup>, Wei Gao<sup>72</sup>, Melissa E Garcia<sup>73</sup>, Christian Gieger<sup>74-76</sup>, Franco Giulianini<sup>39</sup>, Mark O Goodarzi<sup>77,78</sup>, Harald Grallert<sup>74-76</sup>, Niels Grarup<sup>28</sup>, Leif Groop<sup>79</sup>, Megan L Grove<sup>26</sup>, Vilmundur Gudnason<sup>59,80</sup>, Torben Hansen<sup>28,81</sup>, Tamara B Harris<sup>82</sup>, Caroline Hayward<sup>83</sup>, Joel N Hirschhorn<sup>3,84</sup>, Oddgeir L Holmen<sup>85,86</sup>, Jennifer Huffman<sup>83</sup>, Yong Huo<sup>87</sup>, Kristian Hveem<sup>88</sup>, Sehrish Jabeen<sup>10</sup>, Anne U Jackson<sup>25</sup>, Johanna Jakobsdottir<sup>59,89</sup>, Marjo-Riitta Jarvelin<sup>13</sup>, Gorm B Jensen<sup>90</sup>, Marit E Jørgensen<sup>91,92</sup>, J Wouter Jukema<sup>93,94</sup>, Johanne M Justesen<sup>28</sup>, Pia R Kamstrup<sup>95</sup>, Stavroula Kanoni<sup>96</sup>, Fredrik Karpe<sup>97,98</sup>, Frank Kee<sup>99</sup>, Amit V Khera<sup>3,11</sup>, Derek Klarin<sup>3,11,100</sup>, Heikki A Koistinen<sup>101-103</sup>, Jaspal S Kooner<sup>37,38,104</sup>, Charles Kooperberg<sup>105</sup>, Kari Kuulasmaa<sup>101</sup>, Johanna Kuusisto<sup>106</sup>, Markku Laakso<sup>106</sup>, Timo Lakka<sup>107-109</sup>, Claudia Langenberg<sup>110</sup>, Anne Langsted<sup>95,111</sup>, Lenore J Launer<sup>82</sup>, Torsten Lauritzen<sup>112</sup>, David C M Liewald<sup>49,50</sup>, Li An Lin<sup>65</sup>, Allan Linneberg<sup>113-115</sup>, Ruth J F Loos<sup>29,116</sup>, Yingchang Lu<sup>29</sup>, Xiangfeng Lu<sup>41,117</sup>, Reedik Mägi<sup>60</sup>, Anders Malarstig<sup>118,119</sup>, Ani Manichaikul<sup>120</sup>, Alisa K Manning<sup>3,11,121</sup>, Pekka Mäntyselkä<sup>122</sup>, Eirini Marouli<sup>96</sup>, Nicholas G D Masca<sup>123,124</sup>, Andrea Maschio<sup>33</sup>, James B Meigs<sup>3,121,125</sup>, Olle Melander<sup>126</sup>, Andres Metspalu<sup>60</sup>, Andrew P Müller-Nurasyid<sup>76,128,129</sup>, Patricia B Munroe<sup>32,35</sup>, Matt J Neville<sup>97</sup>, Jonas B Nielsen<sup>41</sup>, Sune F Nielsen<sup>95,111</sup>, Børge G Nordestgaard<sup>95,111</sup>, Jose M Ordovas<sup>130-132</sup>, Roxana Mehran<sup>19</sup>, Christopher J O'donnell<sup>100,133</sup>, Marju Orho-Melander<sup>126</sup>, Cliona Molony<sup>134</sup>, Pieter Muntendam<sup>135</sup>, Sandosh Padmanabhan<sup>54</sup>, Colin N A Palmer<sup>45</sup>, Dorota Pasko<sup>69</sup>, Aniruddh P Patel<sup>3,11,133,136</sup>, Oluf Pedersen<sup>28</sup>, Markus Perola<sup>101,137</sup>, Annette Peters<sup>74,76,129</sup>, Charlotta Pisinger<sup>115</sup>, Giorgio Pistis<sup>33</sup>, Ozren Polasek<sup>138,139</sup>, Neil Poulter<sup>140</sup>, Bruce M Psaty<sup>24,141,142</sup>, Daniel J Rader<sup>143</sup>, Asif Rasheed<sup>10</sup>, Rainer Rauramaa<sup>108,109</sup>, Dermot F Reilly<sup>134</sup>, Alex P

Reiner<sup>105,144</sup>, Frida Renström<sup>66,145</sup>, Stephen S Rich<sup>120</sup>, Paul M Ridker<sup>39</sup>, John D Rioux<sup>55</sup>, Neil R Robertson<sup>8,97</sup>, Dan M Roden<sup>52,53</sup>, Jerome I Rotter<sup>42</sup>, Igor Rudan<sup>139</sup>, Veikko Salomaa<sup>101</sup>, Nilesh J Samani<sup>123,124</sup>, Serena Sanna<sup>33</sup>, Naveed Sattar<sup>54,97</sup>, Ellen M Schmidt<sup>146</sup>, Robert A Scott<sup>110</sup>, Peter Sever<sup>140</sup>, Raquel S Sevilla<sup>147</sup>, Christian M Shaffer<sup>53</sup>, Xueling Sim<sup>25,148</sup>, Suthesh Sivapalaratnam<sup>149</sup>, Kerrin S Small<sup>150</sup>, Albert V Smith<sup>59,80</sup>, Blair H Smith<sup>151,152</sup>, Sangeetha Somayajula<sup>153</sup>, Lorraine Southam<sup>8,154</sup>, Timothy D Spector<sup>150</sup>, Elizabeth K Speliotes<sup>146,155</sup>, John M Starr<sup>49,156</sup>, Kathleen E Stirrups<sup>96,157</sup>, Nathan Stitzel<sup>158,159</sup>, Konstantin Strauch<sup>160,161</sup>, Heather M Stringham<sup>25</sup>, Praveen Surendran<sup>5</sup>, Hayato Tada<sup>162</sup>, Alan R Tall<sup>163</sup>, Hua Tang<sup>164</sup>, Jean-Claude Tardif<sup>55,57</sup>, Kent D Taylor<sup>42</sup>, Stella Trompet<sup>93,165</sup>, Philip S Tsao<sup>16,17</sup>, Jaakko Tuomilehto<sup>166–169</sup>, Anne Tybjaerg-Hansen<sup>22,23</sup>, Natalie R van Zuydam<sup>8,45</sup>, Anette Varbo<sup>95,111</sup>, Tibor V Varga<sup>66</sup>, Jarmo Virtamo<sup>101</sup>, Melanie Waldenberger<sup>75,76,129</sup>, Nan Wang<sup>163</sup>, Nick J Wareham<sup>110</sup>, Helen R Warren<sup>32,35</sup>, Peter E Weeke<sup>53,170</sup>, Joshua Weinstock<sup>25</sup>, Jennifer Wessel<sup>171,172</sup>, James G Wilson<sup>173</sup>, Peter W F Wilson<sup>174,175</sup>, Ming Xu<sup>176</sup>, Hanieh Yaghootkar<sup>69</sup>, Robin Young<sup>5</sup>, Eleftheria Zeggini<sup>154</sup>, He Zhang<sup>41</sup>, Neil S Zheng<sup>177</sup>, Weihua Zhang<sup>36</sup>, Yan Zhang<sup>87</sup>, Wei Zhou<sup>146</sup>, Yanhua Zhou<sup>2</sup>, Magdalena Zoledziewska<sup>33</sup>, Joanna MM Howson<sup>5</sup>, John Danesh<sup>5,6,154</sup>, Mark I mccarthy<sup>8,97,98</sup>, Chad A Cowan<sup>4,178</sup>, Goncalo Abecasis<sup>25</sup>, Panos Deloukas<sup>96,179</sup>, Kiran Musunuru<sup>7</sup>, Cristen J Willer<sup>41,71</sup> & Sekar Kathiresan<sup>3,11,133,136</sup>

<sup>1</sup>Department of Public Health Sciences, Institute of Personalized Medicine, Penn State College of Medicine, Hershey, Pennsylvania, USA.

<sup>2</sup>Department of Biostatistics, Boston University School of Public Health, Boston, Massachusetts, USA. <sup>3</sup>Program in Medical and Population Genetics, Broad Institute, Cambridge, Massachusetts, USA. <sup>4</sup>Department of Stem Cell and Regenerative Biology, Harvard Stem Cell Institute, Harvard University, Cambridge, Massachusetts, USA. <sup>5</sup>MRC/ BHF Cardiovascular Epidemiology Unit, Department of Public Health and Primary Care, University of Cambridge, Cambridge, UK. <sup>6</sup>The National Institute for Health Research Blood and Transplant Research Unit (NIHR BTRU) in Donor Health and Genomics at the University of Cambridge, Cambridge, UK. <sup>7</sup>Cardiovascular Institute, Perelman School of Medicine, University of Pennsylvania, Philadelphia, Pennsylvania, USA. <sup>8</sup>Wellcome Trust Centre for Human Genetics, University of Oxford, Oxford, UK. <sup>9</sup>Department of Biostatistics and Epidemiology, Perelman School of Medicine, University of Pennsylvania, Philadelphia, Pennsylvania, USA. <sup>10</sup>Center for Non-Communicable Diseases, Karachi, Pakistan. <sup>11</sup>Center for Genomic Medicine, Massachusetts General Hospital, Boston, Massachusetts, USA. <sup>12</sup>ICDDR, B, Dhaka, Bangladesh. <sup>13</sup>Imperial College London, London, UK. <sup>14</sup>Université Lille, INSERM, CHU Lille, Institut Pasteur de Lille, U1167–RID–AGE–Risk Factors and Molecular Determinants of Aging-related Diseases, Lille, France. <sup>15</sup>Department of Epidemiology and Public Health, EA 3430, University of Strasbourg, Strasbourg, France. <sup>16</sup>VA Palo Alto Health Care System, Palo Alto, California, USA. <sup>17</sup>Department of Medicine, Stanford University School of Medicine, Stanford, California, USA. <sup>18</sup>Zilber School of Public Health, University of Wisconsin–Milwaukee, Milwaukee, Wisconsin, USA. <sup>19</sup>Cardiovascular Institute, Mount Sinai Medical Center, Icahn School of Medicine at Mount Sinai, New York, New York, USA. <sup>20</sup>Department of Medicine, Baylor College of Medicine, Houston, Texas, USA. <sup>21</sup>Department of Cardiology, Rigshospitalet, Copenhagen University Hospital, Copenhagen, Denmark. <sup>22</sup>Department of Clinical Biochemistry, Rigshospitalet, Copenhagen, Denmark. <sup>23</sup>Faculty of Health and Medical Sciences, University of Copenhagen, Copenhagen, Denmark. <sup>24</sup>Cardiovascular Health Research Unit, Department of Medicine, University of Washington, Seattle, Washington, USA. <sup>25</sup>Center for Statistical Genetics, Department of Biostatistics, University of Michigan School of Public Health, Ann Arbor, Michigan, USA. <sup>26</sup>Human Genetics Center, Department of Epidemiology, Human Genetics, and Environmental Sciences, School of Public Health, The University of Texas Health Science Center at Houston, Houston, Texas, USA. <sup>27</sup>Human Genome Sequencing Center, Baylor College of Medicine, Houston, Texas, USA. <sup>28</sup>The Novo Nordisk Foundation Center for Basic Metabolic Research, Faculty of Health and Medical Sciences, University of Copenhagen, Copenhagen, Denmark. <sup>29</sup>The Charles Bronfman Institute for Personalized Medicine, Ichan School of Medicine at Mount Sinai, New York, New York, USA. <sup>30</sup>Department of Clinical Biochemistry, Lillebaelt Hospital, Vejle, Denmark. <sup>31</sup>Institute of Regional Health Research, University of Southern Denmark, Odense, Denmark. <sup>32</sup>Clinical Pharmacology, William Harvey Research Institute, Barts and The London School of Medicine and Dentistry, Queen Mary University of London, London, UK. <sup>33</sup>Istituto di Ricerca Genetica e Biomedica, Consiglio Nazionale delle Ricerche (CNR), Monserrato, Cagliari, Italy. <sup>34</sup>The Barts Heart Centre, William Harvey Research Institute, Queen Mary University of London, London, UK. <sup>35</sup>NIHR Barts Cardiovascular Biomedical Research Unit, Queen Mary University of London, London, UK. <sup>36</sup>Department of Epidemiology and Biostatistics, School of Public Health, Imperial College London, London, UK. <sup>37</sup>Department of Cardiology, Ealing Hospital NHS Trust, Southall, UK. <sup>38</sup>Imperial College Healthcare NHS Trust, London, UK. <sup>39</sup>Division of Preventive Medicine, Brigham and Women’s Hospital, Boston, Massachusetts, USA. <sup>40</sup>Department of Medicine, Harvard Medical School, Boston, Massachusetts, USA. <sup>41</sup>Department of Internal Medicine, Division of Cardiovascular Medicine, University of Michigan, Ann Arbor, Michigan, USA. <sup>42</sup>The Institute for Translational Genomics and Population Sciences, LABioMed at Harbor–UCLA Medical Center, Departments of

Pediatrics and Medicine, Los Angeles, California, USA. <sup>43</sup>Medical Department, Lillebaelt Hospital, Vejle, Denmark. <sup>44</sup>NHLBI Framingham Heart Study, Framingham, Massachusetts, USA. <sup>45</sup>Medical Research Institute, Ninewells Hospital and Medical School, University of Dundee, Dundee, UK. <sup>46</sup>Dipartimento di Scienze Biomediche, Università degli Studi di Sassari, Sassari, Italy. <sup>47</sup>Corporal Michael Crescenz VA Medical Center, Philadelphia, Pennsylvania, USA. <sup>48</sup>Department of Surgery, Perelman School of Medicine, University of Pennsylvania, Philadelphia, Pennsylvania, USA. <sup>49</sup>Centre for Cognitive Ageing and Cognitive Epidemiology, University of Edinburgh, Edinburgh, UK. <sup>50</sup>Department of Psychology, University of Edinburgh, Edinburgh, UK. <sup>51</sup>Department of Nutrition and Dietetics, School of Health Science and Education, Harokopio University, Athens, Greece. <sup>52</sup>Department of Biomedical Informatics, Vanderbilt University Medical Center, Nashville, Tennessee, USA. <sup>53</sup>Department of Medicine, Vanderbilt University Medical Center, Nashville, Tennessee, USA. <sup>54</sup>British Heart Foundation Glasgow Cardiovascular Research Centre, Institute of Cardiovascular and Medical Sciences, College of Medical, Veterinary and Life Sciences, University of Glasgow, Glasgow, UK. <sup>55</sup>Montreal Heart Institute, Montreal, Quebec, Canada. <sup>56</sup>Université de Montréal Beaulieu-Saucier Pharmacogenomics Center, Montreal, Quebec, Canada. <sup>57</sup>Université de Montréal, Montreal, Quebec, Canada. <sup>58</sup>Department of Medicine, Oulu University Hospital and University of Oulu, Oulu, Finland. <sup>59</sup>The Icelandic Heart Association, Kopavogur, Iceland. <sup>60</sup>Estonian Genome Center, University of Tartu, Tartu, Estonia. <sup>61</sup>Division of Statistical Genomics, Department of Genetics, Washington University School of Medicine, St. Louis, Missouri, USA. <sup>62</sup>Research Centre in Epidemiology and Preventive Medicine–EPIMED, Department of Medicine and Surgery, University of Insubria, Varese, Italy. <sup>63</sup>Department of Epidemiology, UMR 1027–INSERM, Toulouse University–CHU Toulouse, Toulouse, France. <sup>64</sup>Robertson Centre for Biostatistics, University of Glasgow, Glasgow, UK. <sup>65</sup>Institute of Molecular Medicine, The University of Texas Health Science Center at Houston, Houston, Texas, USA. <sup>66</sup>Department of Clinical Sciences, Genetic and Molecular Epidemiology Unit, Lund University, Malmö, Sweden. <sup>67</sup>Department of Public Health & Clinical Medicine, Umeå University, Umeå, Sweden. <sup>68</sup>Department of Nutrition, Harvard T. H. Chan School of Public Health, Boston, Massachusetts, USA. <sup>69</sup>Genetics of Complex Traits, University of Exeter Medical School, University of Exeter, Exeter, UK. <sup>70</sup>Centro Nacional de Investigaciones Cardiovasculares Carlos III (CNIC), Madrid, Spain. <sup>71</sup>Department of Human Genetics, University of Michigan, Ann Arbor, Michigan, USA. <sup>72</sup>Department of Cardiology, Peking University Third Hospital, Key Laboratory of Cardiovascular Molecular Biology and Regulatory Peptides, Ministry of Health, Beijing, China. <sup>73</sup>National Heart, Lung, and Blood Institute, Bethesda, Maryland, USA. <sup>74</sup>German Center for Diabetes Research (DZD e.V.), Neuherberg, Germany. <sup>75</sup>Research Unit of Molecular Epidemiology, Helmholtz Zentrum München, German Research Center for Environmental Health, Neuherberg, Germany. <sup>76</sup>Institute of Epidemiology II, Helmholtz Zentrum München–German Research Center for Environmental Health, Neuherberg, Germany. <sup>77</sup>Departments of Medicine and of Biomedical Sciences, Cedars-Sinai Medical Center, Los Angeles, California, USA. <sup>78</sup>Division of Endocrinology, Diabetes and Metabolism, Cedars-Sinai Medical Center, Los Angeles, California, USA. <sup>79</sup>Department of Clinical Sciences, Diabetes and Endocrinology, Clinical Research Centre, Lund University, Malmö, Sweden. <sup>80</sup>Faculty of Medicine, University of Iceland, Reykjavik, Iceland. <sup>81</sup>Faculty of Health Sciences, University of Southern Denmark, Odense, Denmark. <sup>82</sup>Laboratory of Epidemiology and Population Sciences, National Institute on Aging, Bethesda, Maryland, USA. <sup>83</sup>Medical Research Council Human Genetics Unit, Institute of Genetics and Molecular Medicine, University of Edinburgh, Edinburgh, UK. <sup>84</sup>Division of Endocrinology and Center for Basic and Translational Obesity Research, Boston Children’s Hospital, Boston, Massachusetts, USA. <sup>85</sup>Department of Public Health and General Practice, HUNT Research Centre, Norwegian University of Science and Technology, Levanger, Norway. <sup>86</sup>St. Olavs Hospital, Trondheim University Hospital, Trondheim, Norway. <sup>87</sup>Department of Cardiology, Peking University First Hospital, Beijing, China. <sup>88</sup>K. G. Jebsen Center for Genetic Epidemiology, Department of Public Health and Nursing, Faculty of Medicine and Health Sciences, Norwegian University of Science and Technology (NTNU), Trondheim, Norway. <sup>89</sup>Department of Health Sciences, University of Iceland, Reykjavik, Iceland. <sup>90</sup>The Copenhagen City Heart Study, Frederiksberg Hospital, Copenhagen, Denmark. <sup>91</sup>Steno Diabetes Center, Gentofte, Denmark. <sup>92</sup>National Institute of Public Health, Southern Denmark University, Copenhagen, Denmark. <sup>93</sup>Department of Cardiology, Leiden University Medical Center, Leiden, the Netherlands. <sup>94</sup>The Interuniversity Cardiology Institute of the Netherlands, Utrecht, the Netherlands. <sup>95</sup>Department of Clinical Biochemistry and the Copenhagen General Population Study, Herlev and Gentofte Hospital, Copenhagen University Hospital, Copenhagen, Denmark. <sup>96</sup>William Harvey Research Institute, Barts and The London School of Medicine and Dentistry, Queen Mary University of London, London, UK. <sup>97</sup>Oxford Centre for Diabetes, Endocrinology and Metabolism, Radcliffe Department of Medicine, University of Oxford, Oxford, UK. <sup>98</sup>Oxford NIHR Biomedical Research Centre, Oxford University Hospitals Trust, Oxford, UK. <sup>99</sup>UKCRC Centre of Excellence for Public Health, Queens University, Belfast, UK. <sup>100</sup>Massachusetts Veterans Epidemiology Research and Information Center (MAVERIC), VA Boston Healthcare System, Boston, Massachusetts, USA. <sup>101</sup>Department of Health, National Institute for Health and Welfare, Helsinki, Finland. <sup>102</sup>Department of Medicine and Abdominal Center: Endocrinology, University of Helsinki and Helsinki University Central Hospital, Helsinki, Finland. <sup>103</sup>Minerva Foundation Institute for Medical Research, Helsinki, Finland. <sup>104</sup>National Heart and Lung Institute, Imperial College London, Hammersmith Hospital, London, UK. <sup>105</sup>Division of Public Health Sciences, Fred Hutchinson Cancer Research Center, Seattle, Washington, USA. <sup>106</sup>Institute of Clinical Medicine, Internal Medicine, University of Eastern Finland and Kuopio University Hospital, Kuopio, Finland. <sup>107</sup>Department of Physiology, Institute of Biomedicine, University of Eastern Finland, Kuopio Campus, Kuopio, Finland. <sup>108</sup>Kuopio Research Institute of Exercise Medicine, Kuopio, Finland. <sup>109</sup>Department of Clinical Physiology and Nuclear Medicine, Kuopio University Hospital, Kuopio, Finland. <sup>110</sup>MRC Epidemiology Unit, Institute of Metabolic Science, University of Cambridge School of Clinical Medicine, Cambridge, UK. <sup>111</sup>Faculty of Health and Medical Sciences, University of Denmark, Copenhagen, Denmark. <sup>112</sup>Department of Public Health, Section of General Practice, University of Aarhus, Aarhus, Denmark. <sup>113</sup>Department of Clinical Experimental Research, Rigshospitalet, Glostrup, Denmark. <sup>114</sup>Department of Clinical Medicine, Faculty of Health and Medical Sciences, University of Copenhagen, Copenhagen, Denmark. <sup>115</sup>Research Center for Prevention and Health, Copenhagen, Denmark. <sup>116</sup>The Mindich Child Health and Development Institute, Ichan School of Medicine at Mount Sinai, New York, New York, USA. <sup>117</sup>State Key Laboratory of Cardiovascular Disease, Fuwai Hospital, National Center for Cardiovascular Diseases, Chinese Academy of Medical Sciences and Peking Union Medical College, Beijing, China. <sup>118</sup>Cardiovascular Genetics and Genomics Group, Cardiovascular Medicine Unit, Department of Medicine, Solna, Karolinska Institutet, Stockholm, Sweden. <sup>119</sup>Pharmatherapeutics Clinical Research, Pfizer Worldwide R&D, Sollentuna, Sweden. <sup>120</sup>Center for

Public Health Genomics, University of Virginia, Charlottesville, Virginia, USA. <sup>121</sup>Department of Medicine, Massachusetts General Hospital, Boston, Massachusetts, USA. <sup>122</sup>Unit of Primary Health Care, University of Eastern Finland and Kuopio University Hospital, Kuopio, Finland. <sup>123</sup>Department of Cardiovascular Sciences, University of Leicester, Leicester, UK. <sup>124</sup>NIHR Leicester Biomedical Research Centre, Glenfield Hospital, Leicester, UK. <sup>125</sup>Division of General Internal Medicine, Massachusetts General Hospital, Boston, Massachusetts, USA. <sup>126</sup>Department of Clinical Sciences, University Hospital Malmo Clinical Research Center, Lund University, Malmo, Sweden. <sup>127</sup>Department of Biostatistics, University of Liverpool, Liverpool, UK. <sup>128</sup>Department of Medicine I, Ludwig-Maximilians-University, Munich, Germany. <sup>129</sup>DZHK German Centre for Cardiovascular Research, Munich Heart Alliance, Munich, Germany. <sup>130</sup>Department of Cardiovascular Epidemiology and Population Genetics, National Center for Cardiovascular Investigation, Madrid, Spain. <sup>131</sup>IMDEA-Alimentacion, Madrid, Spain. <sup>132</sup>Nutrition and Genomics Laboratory, Jean Mayer–USDA Human Nutrition Research Center on Aging at Tufts University, Boston, Massachusetts, USA. <sup>133</sup>Department of Medicine, Harvard Medical School, Boston, Massachusetts, USA. <sup>134</sup>Genetics, Merck Sharp & Dohme Corporation, Kenilworth, New Jersey, USA. <sup>135</sup>G3 Pharmaceuticals, Lexington, Massachusetts, USA. <sup>136</sup>Cardiovascular Research Center, Massachusetts General Hospital, Boston, Massachusetts, USA. <sup>137</sup>Institute of Molecular Medicine FIMM, University of Helsinki, Finland. <sup>138</sup>Faculty of Medicine, University of Split, Split, Croatia. <sup>139</sup>Usher Institute of Population Health Sciences and Informatics, University of Edinburgh, Edinburgh, UK. <sup>140</sup>International Centre for Circulatory Health, Imperial College London, London, UK. <sup>141</sup>Kaiser Permanente Washington Health Research Institute, Seattle, Washington, USA. <sup>142</sup>Departments of Epidemiology and Health Services, University of Washington, Seattle, Washington, USA. <sup>143</sup>Departments of Genetics, Medicine, and Pediatrics, Perelman School of Medicine, University of Pennsylvania, Philadelphia, Pennsylvania, USA. <sup>144</sup>Department of Epidemiology, University of Washington, Seattle, Washington, USA. <sup>145</sup>Department of Biobank Research, Umeå University, Umeå, Sweden. <sup>146</sup>Department of Computational Medicine and Bioinformatics, University of Michigan, Ann Arbor, Michigan, USA. <sup>147</sup>Imaging, Merck Sharp & Dohme Corporation, Kenilworth, New Jersey, USA. <sup>148</sup>Saw Swee Hock School of Public Health, National University of Singapore, Singapore. <sup>149</sup>Department of Vascular Medicine, Academic Medical Center, University of Amsterdam, Amsterdam, the Netherlands. <sup>150</sup>Department of Twin Research and Genetic Epidemiology, King’s College London, London, UK. <sup>151</sup>Division of Population Health Sciences, Ninewells Hospital and Medical School, University of Dundee, Dundee, UK. <sup>152</sup>Generation Scotland, Centre for Genomic and Experimental Medicine, University of Edinburgh, Edinburgh, UK. <sup>153</sup>Scientific Informatics, Merck Sharp & Dohme Corporation, Kenilworth, New Jersey, USA. <sup>154</sup>Wellcome Trust Sanger Institute, Genome Campus, Hinxton, UK. <sup>155</sup>Department of Internal Medicine, Division of Gastroenterology, University of Michigan, Ann Arbor, Michigan, USA. <sup>156</sup>Alzheimer Scotland Dementia Research Centre, University of Edinburgh, Edinburgh, UK. <sup>157</sup>Department of Haematology, University of Cambridge, Cambridge, UK. <sup>158</sup>Cardiovascular Division, Departments of Medicine and Genetics, Washington University School of Medicine, St. Louis, Missouri, USA. <sup>159</sup>The McDonnell Genome Institute, Washington University School of Medicine, St. Louis, Missouri, USA. <sup>160</sup>IBE, Faculty of Medicine, Ludwig-Maximilians-Universität Munich, Germany. <sup>161</sup>Institute of Genetic Epidemiology, Helmholtz Zentrum München, German Research Center for Environmental Health, Neuherberg, Germany. <sup>162</sup>Division of Cardiovascular Medicine, Kanazawa University Graduate School of Medicine, Kanazawa, Japan. <sup>163</sup>Department of Medicine, Division of Molecular Medicine, Columbia University, New York, New York, USA. <sup>164</sup>Department of Genetics, Stanford University School of Medicine, Stanford, California, USA. <sup>165</sup>Department of Gerontology and Geriatrics, Leiden University Medical Center, Leiden, the Netherlands. <sup>166</sup>Chronic Disease Prevention Unit, National Institute for Health and Welfare, Helsinki, Finland. <sup>167</sup>Dasman Diabetes Institute, Dasman, Kuwait. <sup>168</sup>Centre for Vascular Prevention, Danube-University Krems, Krems, Austria. <sup>169</sup>Saudi Diabetes Research Group, King Abdulaziz University, Fahd Medical Research Center, Jeddah, Saudi Arabia. <sup>170</sup>The Heart Centre, Department of Cardiology, Copenhagen University Hospital, Rigshospitalet, Copenhagen, Denmark. <sup>171</sup>Department of Epidemiology, Indiana University Fairbanks School of Public Health, Indianapolis, Indiana, USA. <sup>172</sup>Department of Medicine, Indiana University School of Medicine, Indianapolis, Indiana, USA. <sup>173</sup>Department of Physiology and Biophysics, University of Mississippi Medical Center, Jackson, Mississippi, USA. <sup>174</sup>Atlanta VA Medical Center, Decatur, Georgia, USA. <sup>175</sup>Emory Clinical Cardiovascular Research Institute, Atlanta, Georgia, USA. <sup>176</sup>Department of Cardiology, Institute of Vascular Medicine, Peking University Third Hospital, Key Laboratory of Molecular Cardiovascular Sciences, Ministry of Education, Beijing, China. <sup>177</sup>Yale College, Yale University, New Haven, Connecticut, USA. <sup>178</sup>Center for Regenerative Medicine, Massachusetts General Hospital, Boston, Massachusetts, USA. <sup>179</sup>Princess Al-Jawhara Al-Brahim Centre of Excellence in Research of Hereditary Disorders (PACER-HD), King Abdulaziz University, Jeddah, Saudi Arabia.

## Myocardial Infarction Genetics Consortium Investigators

Amit V. Khera, MD,<sup>a,b</sup> Hong-Hee Won, PhD,<sup>c</sup> Gina M. Peloso, PhD,<sup>b,d</sup> Kim S. Lawson, MS,<sup>e</sup> Traci M. Bartz, MS,<sup>f</sup> Xuan Deng, MSc,<sup>d</sup> Elisabeth M. van Leeuwen,<sup>g</sup> Pradeep Natarajan, MD, MMSc,<sup>a,b</sup> Connor A. Emdin, HBSc,<sup>b</sup> Alexander G. Bick, BS,<sup>b</sup> Alanna C. Morrison, PhD,<sup>e</sup> Jennifer A. Brody,<sup>h</sup> BA, Namrata Gupta, PhD,<sup>b</sup> Akihiro Nomura, MD,<sup>b,i</sup> Thorsten Kessler, MD,<sup>j</sup> Stefano Duga, PhD,<sup>k</sup> Joshua C. Bis, PhD,<sup>h</sup> Cornelia M. van Duijn, PhD,<sup>g</sup> L. Adrienne Cupples, PhD,<sup>d</sup> Bruce Psaty, MD, PhD,<sup>h,l</sup> Daniel J. Rader, MD,<sup>m</sup> John Danesh, FMedSci,<sup>n</sup> Heribert Schunkert,<sup>j</sup> MD, Ruth McPherson, MD,<sup>o</sup> Martin

Farrall, FRCPath,<sup>p</sup> Hugh Watkins, MD,<sup>p</sup> PhD, Eric Lander, PhD,<sup>b</sup> James G. Wilson, MD,<sup>q</sup> Adolfo Correa, MD, PhD,<sup>r</sup> Eric Boerwinkle, PhD,<sup>e</sup> Piera Angelica Merlini, MD,<sup>s</sup> Diego Ardissino, MD,<sup>t</sup> Danish Saleheen, MB,BS,PhD,<sup>u</sup> Stacey Gabriel, PhD,<sup>b</sup> Sekar Kathiresan, MD<sup>a,b</sup>

<sup>a</sup> Center for Genomic Medicine, Cardiovascular Research Center and Cardiology Division (Khera, Natarajan, Kathiresan), Massachusetts General Hospital, Harvard Medical School, Boston MA <sup>b</sup> Program in Medical and Population Genetics, Broad Institute, Cambridge, MA <sup>c</sup> Samsung Advanced Institute for Health Sciences and Technology (SAIHST), Sungkyunkwan University, Samsung Medical Center, Seoul, Korea <sup>d</sup> Department of Biostatistics, Boston University School of Public Health <sup>e</sup> Human Genetics Center and Institute of Molecular Medicine, University of Texas-Houston Health Science Center, Houston, TX <sup>f</sup> Department of Biostatistics, University of Washington, Seattle, Washington; <sup>g</sup> Department of Epidemiology, Erasmus Medical Center, Rotterdam, The Netherlands <sup>h</sup> Cardiovascular Health Research Unit, University of Washington <sup>i</sup> Division of Cardiovascular Medicine, Kanazawa University Graduate School of Medical Science, Kanazawa, Japan <sup>j</sup> Deutsches Herzzentrum München, Technische Universität München, Deutsches Zentrum für Herz-Kreislauf- Forschung (DZHK); Munich Heart Alliance, München, Germany (Kessler, Schunkert); <sup>k</sup> Department of Biomedical Sciences, Humanitas University, Via Manzoni 113, 20089 Rozzano, Milan, Italy; Humanitas Clinical and Research Center, Via Manzoni 56, 20089 Rozzano, Milan, Italy <sup>l</sup> Departments of Medicine, Epidemiology, and Health Services, University of Washington <sup>m</sup> Departments of Genetics, University of Pennsylvania, Philadelphia <sup>n</sup> Public Health and Primary Care, University of Cambridge, Cambridge, Wellcome Trust Sanger Institute, Wellcome Trust Genome Campus, Hinxton, Cambridge, UK, and NIHR Blood and Transplant Research Unit in Donor Health and Genomics, Department of Public Health and Primary Care, University of Cambridge, Cambridge, United Kingdom <sup>o</sup> University of Ottawa Heart Institute, Ottawa, Canada <sup>p</sup> Division of Cardiovascular Medicine, Radcliffe Department of Medicine and the Wellcome Trust Centre for Human Genetics, University of Oxford, Oxford, United Kingdom <sup>q</sup> Department of Physiology and Biophysics, University of Mississippi Medical Center, Jackson, Mississippi <sup>r</sup> Jackson Heart Study, Department of Medicine, University of Mississippi Medical Center <sup>s</sup> Ospedale Niguarda, Milano Italy <sup>t</sup> Division of Cardiology, Azienda Ospedaliero-Universitaria di Parma, University of Parma Parma, Italy; ASTC - Associazione Per Lo Studio Della Trombosi In Cardiologia, Pavia Italy (Ardissino) <sup>u</sup> Biostatistics and Epidemiology, Perelman School of Medicine, University of Pennsylvania

## Geisinger-Regeneron DiscovEHR Collaboration

URL: <http://www.discovershare.com/>





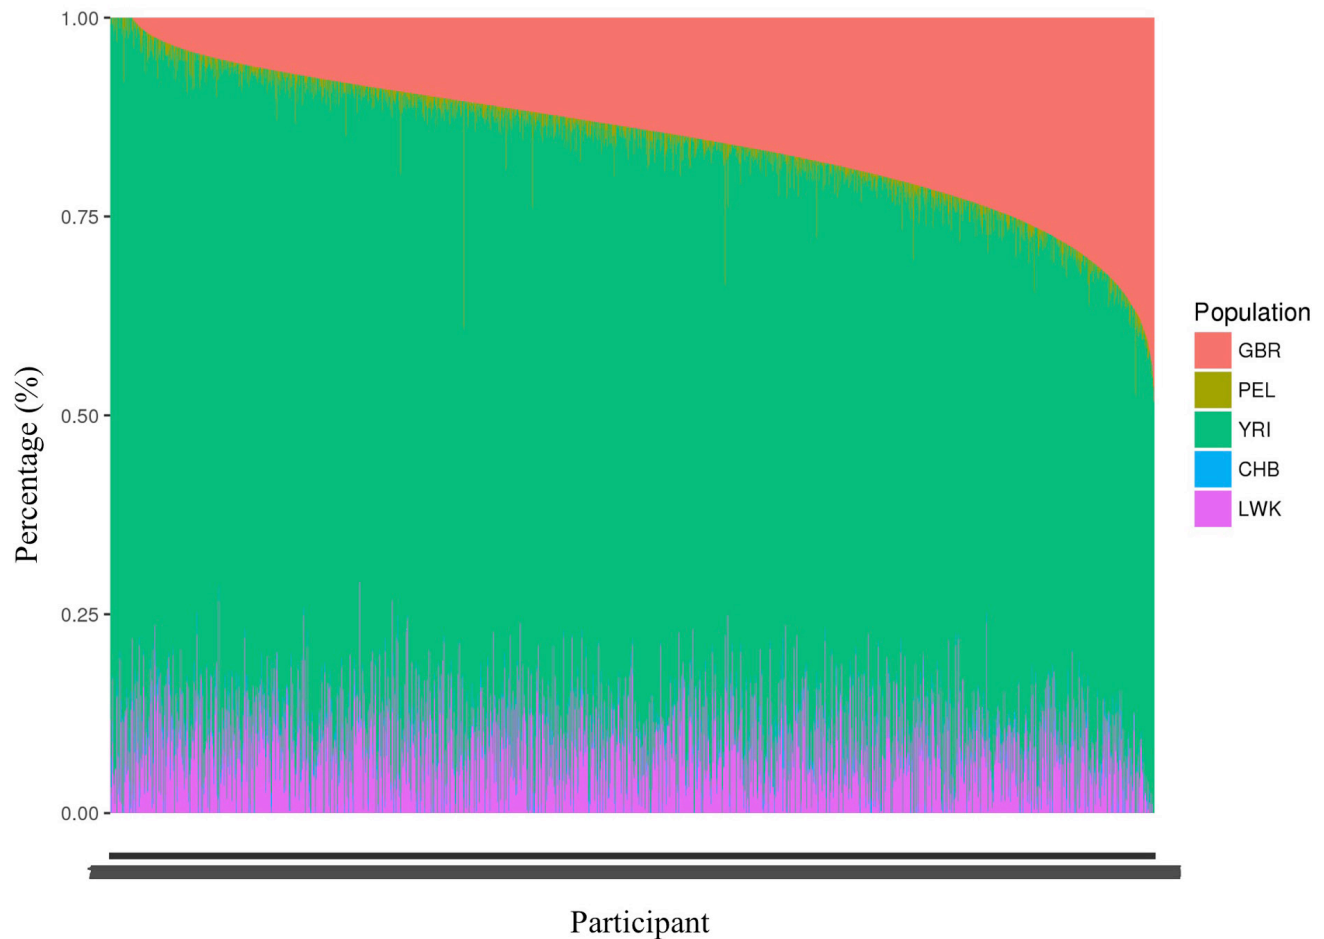

### Supplementary Figure 1

#### Admixture plot for non-Hispanic black participants in the Million Veteran Program

A supervised ADMIXTURE<sup>1</sup> analysis was performed on all MVP samples using 1000 Genomes Project<sup>2</sup> reference samples as the reference panel. Following training of the ADMIXTURE model on 5 populations representing East Asia (CHB), Europe (GBR), East Africa (LWK), South America (PEL), and West Africa (YRI), individuals with at least 50% African (LWK or YRI) ancestry and self-identifying as “non-Hispanic” and “black” were assigned to a separate MVP “black” population. The x-axis depicts each of the 57,332 samples assigned to this group, the Y-axis shows the percentage of each reference population per sample.

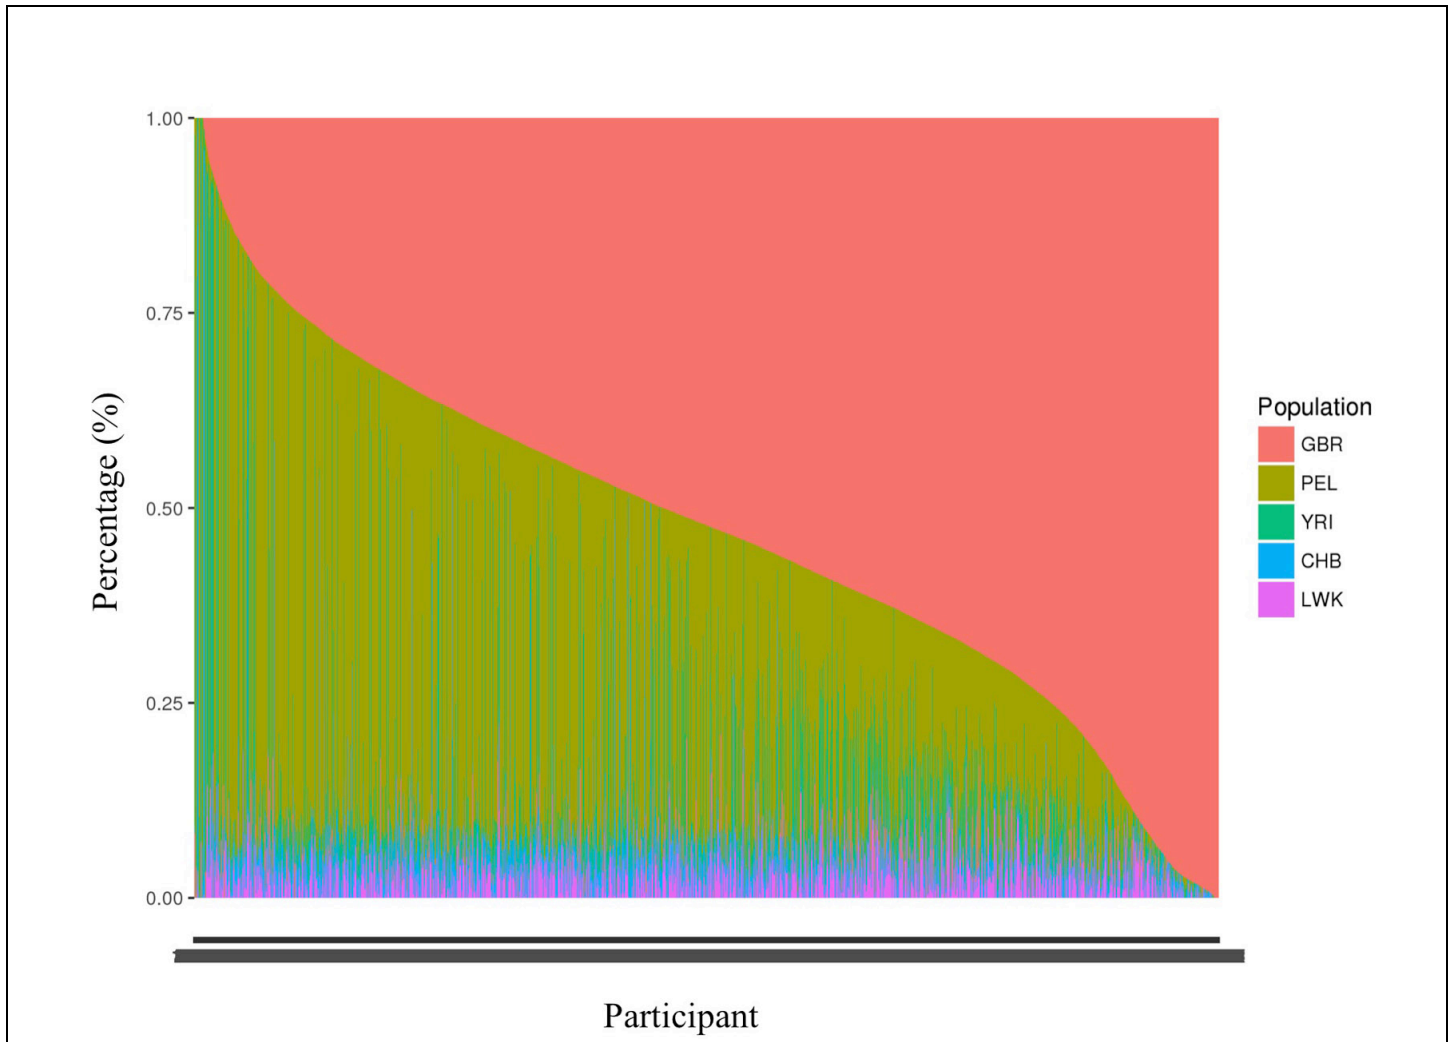

**Supplementary Figure 2**

**Admixture plot for Hispanic participants in the Million Veteran Program**

A supervised ADMIXTURE<sup>1</sup> analysis was performed on all MVP samples using 1000 Genomes Project<sup>2</sup> reference samples as the reference panel. Following training of the ADMIXTURE model on 5 populations representing East Asia (CHB), Europe (GBR), East Africa (LWK), South America (PEL), and West Africa (YRI), individuals self-identifying as “Hispanic” were assigned to a separate MVP “Hispanic” population. The x-axis depicts each of the 24,743 samples assigned to this group, the Y-axis shows the percentage of each reference population per sample.

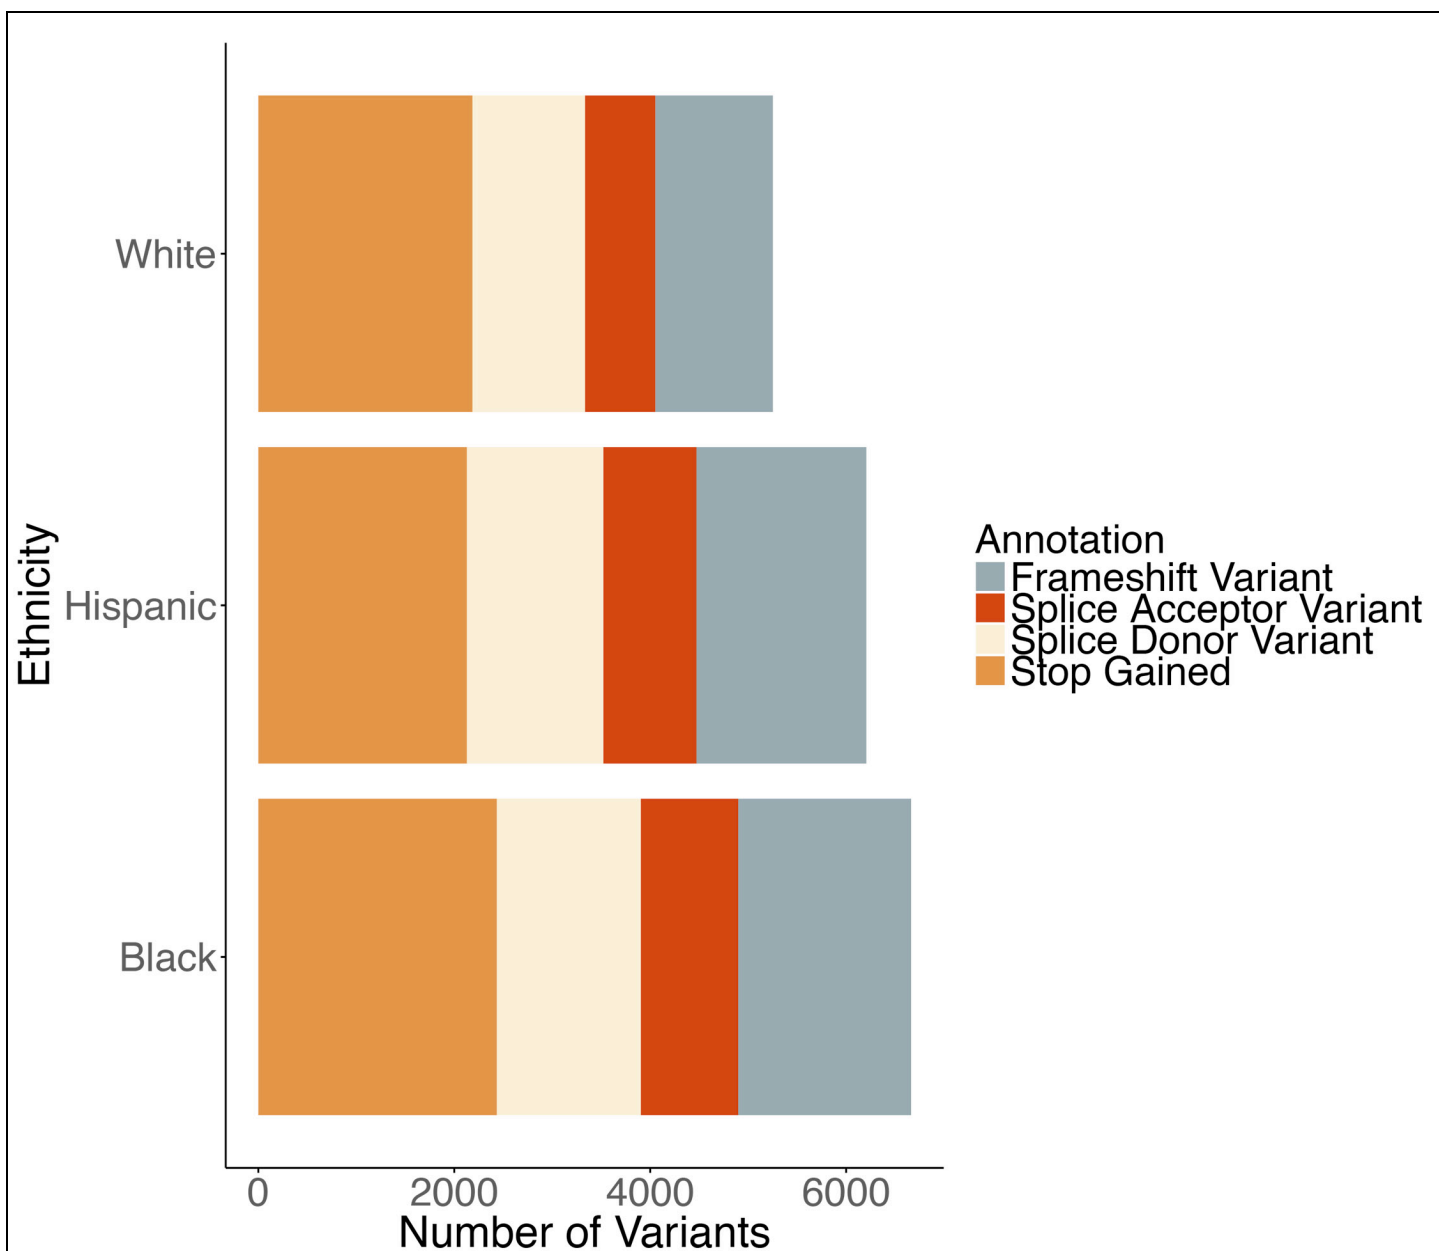

**Supplementary Figure 3**

**Predicted Loss of Function (pLoF) Variation in Million Veteran Program Participants**

The number of pLoF variants passing quality control for white, black, and Hispanic participants in MVP. Each pLoF annotation (frameshift, splice donor/acceptor, stop gained) is depicted by a separate color.

Abbreviations: MVP, Million Veteran Program; pLoF, predicted Loss of Function

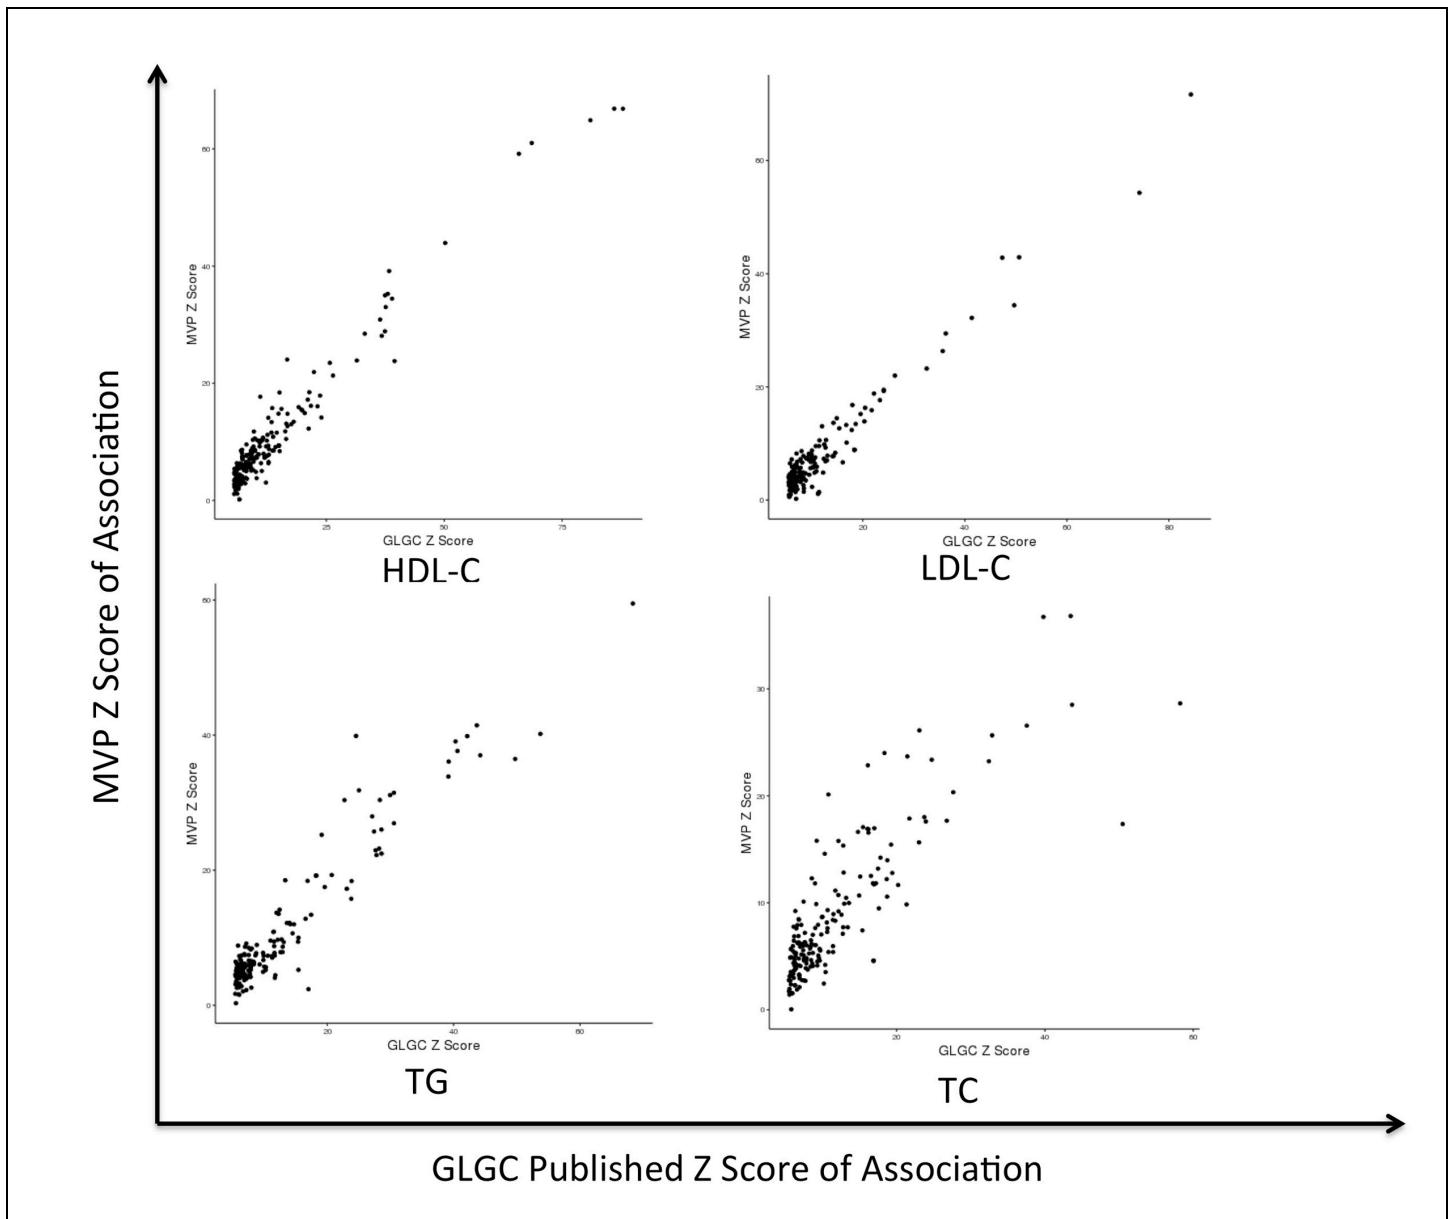

**Supplementary Figure 4**

**Comparison of MVP lipid association Z score to previously published GLGC lipid association Z score**

Plot of the linear regression Z score of association ( $\beta/SE$ ) for 444 independent lipid exome-wide associated (two-sided  $P < 2.2 \times 10^{-7}$ ) DNA sequence variants per trait as reported in the published GLGC 2017 exome chip analysis<sup>3</sup> and in our MVP discovery GWAS analysis aligned to the lipid raising allele. A strong association (two-sided linear regression  $P < 1.0 \times 10^{-100}$ ) between published (GLGC) and MVP Z scores was observed for each trait.

Abbreviations: SE, standard error; GLGC, Global Lipids Genetics Consortium; MVP, Million Veteran Program; HDL-C, High-Density Lipoprotein Cholesterol; LDL-C, Low-Density Lipoprotein Cholesterol; TG, Triglycerides; TC, Total Cholesterol

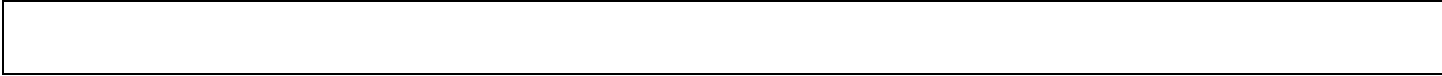

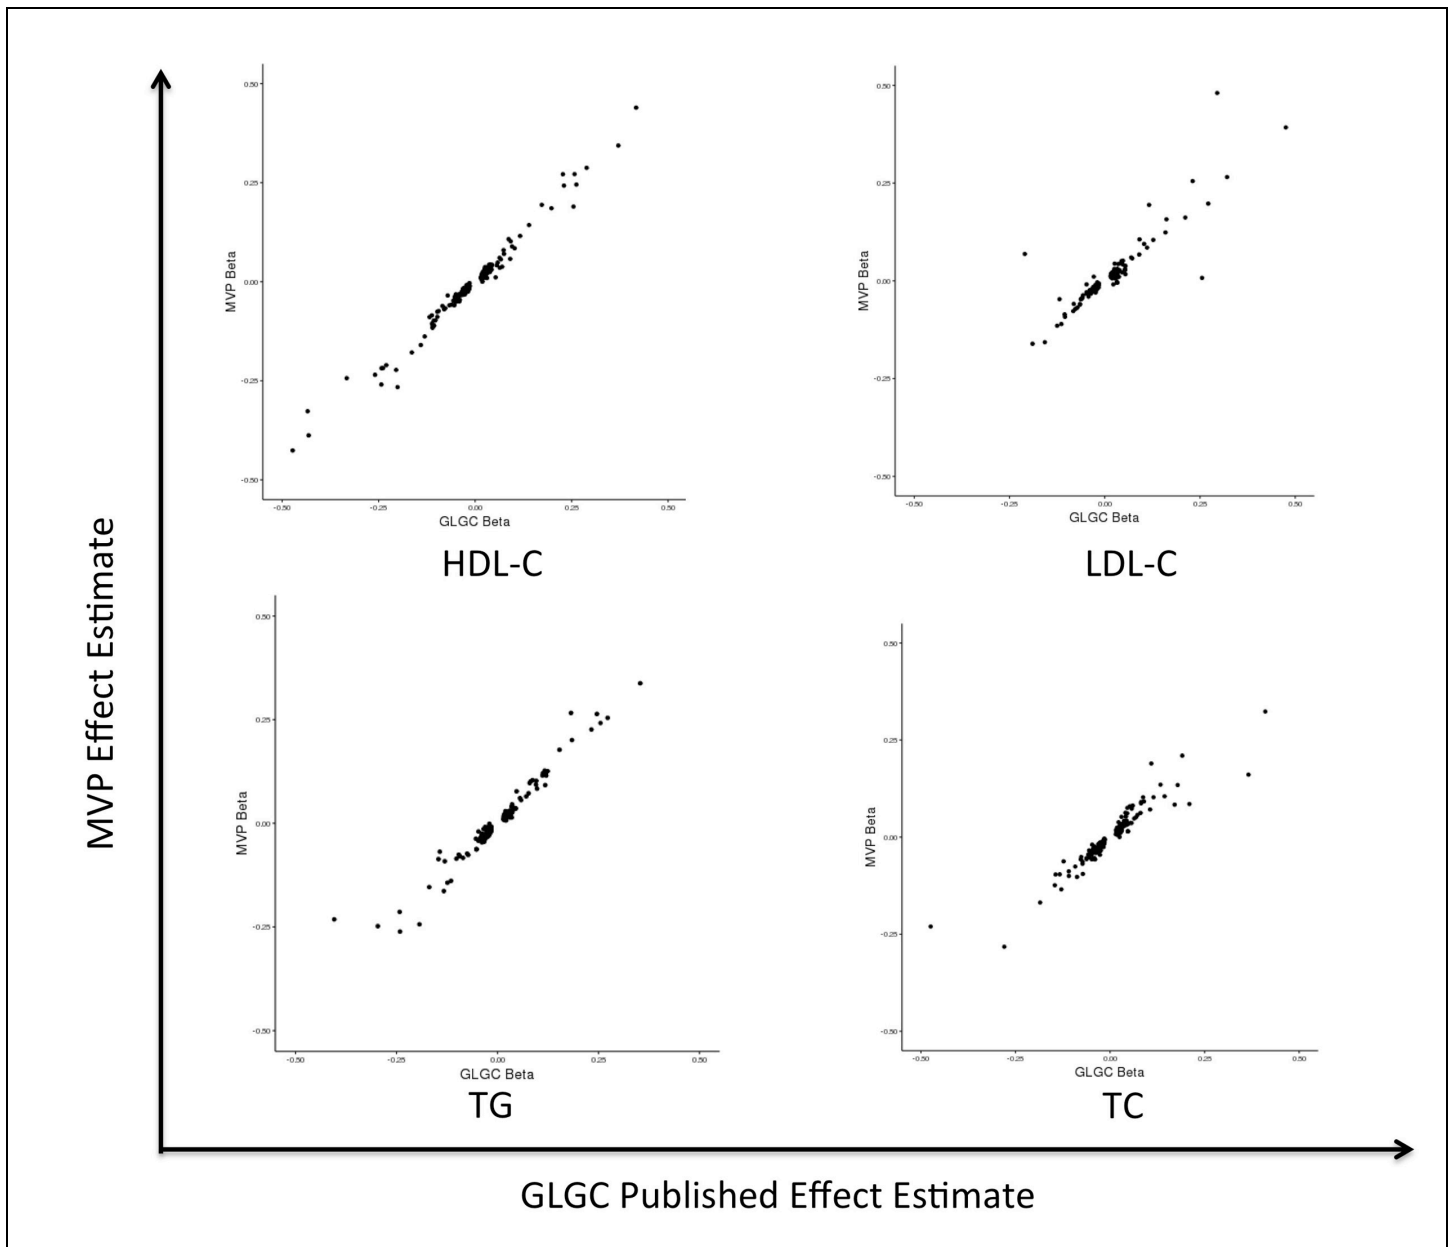

**Supplementary Figure 5**

**Comparison of MVP effect estimates to previously published GLGC effect estimates for lipid traits**

Plot of the linear regression effect estimates ( $\beta$ ) for 444 independent lipid exome-wide associated (two-sided  $P < 2.2 \times 10^{-7}$ ) DNA sequence variants per trait as reported in the published GLGC 2017 exome chip analysis<sup>3</sup> and in our MVP discovery GWAS analysis. The linear regression effect estimate between MVP discovery and published (GLGC)  $\beta$  values demonstrated evidence of the winner's curse ( $\beta = 0.72, 0.90, 0.85, 0.96$  for LDL-C, TG, TC, and HDL-C, respectively after exclusion of extreme outliers).

Abbreviations: GLGC, Global Lipids Genetics Consortium; MVP, Million Veteran Program; HDL-C, High-Density Lipoprotein Cholesterol; TG, Triglycerides; LDL-C, Low-Density Lipoprotein Cholesterol; TC, Total Cholesterol

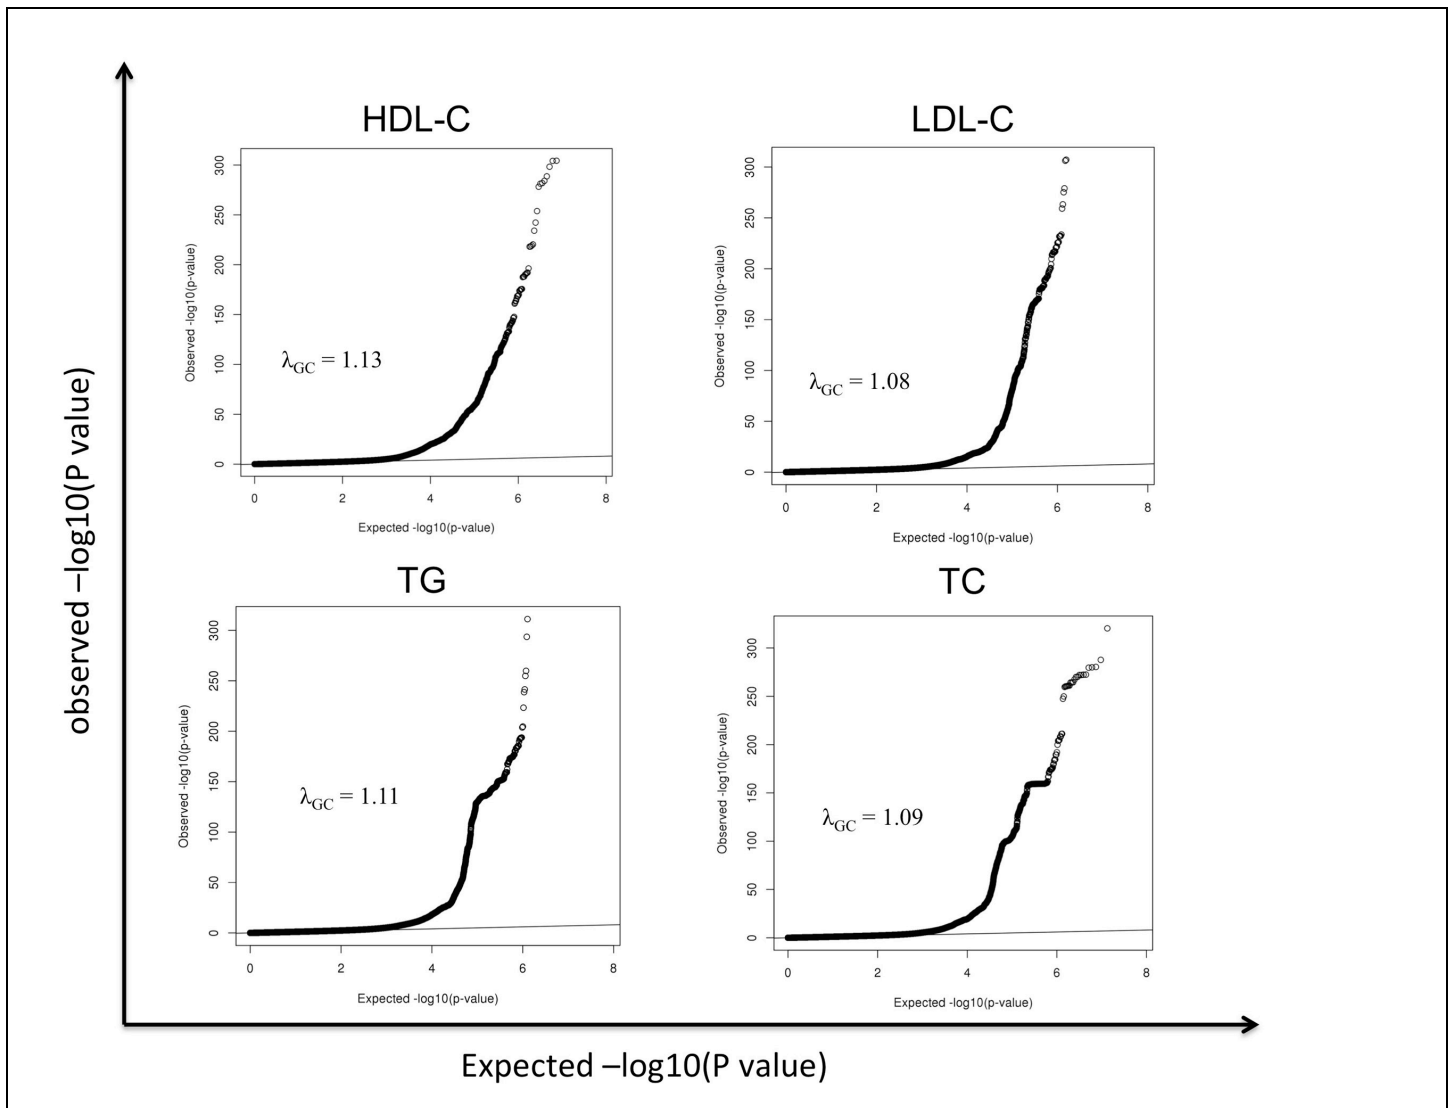

**Supplementary Figure 6**

**Quantile-quantile plots for the discovery lipids GWAS in MVP**

The expected linear regression two-sided P values versus the observed distribution of two-sided P values for LDL cholesterol (n=297,218 individuals), triglycerides (n=291,993 individuals), total cholesterol (n=297,626 individuals), and HDL cholesterol (n=291,746 individuals) association are displayed. Quantile-quantile plots were inspected for ancestry specific analyses, and genomic control values were < 1.20 for each racial group (data not shown). The inflation observed ( $\lambda_{GC} = 1.08-1.13$ ) is comparable to that observed in other studies of polygenic traits with similar large sample sizes ( $n > 300,000$ )<sup>4,5</sup>. Abbreviations: HDL-C, High-Density Lipoprotein Cholesterol; TG, Triglycerides; LDL-C, Low-Density Lipoprotein Cholesterol; TC, Total Cholesterol; MVP, Million Veteran Program

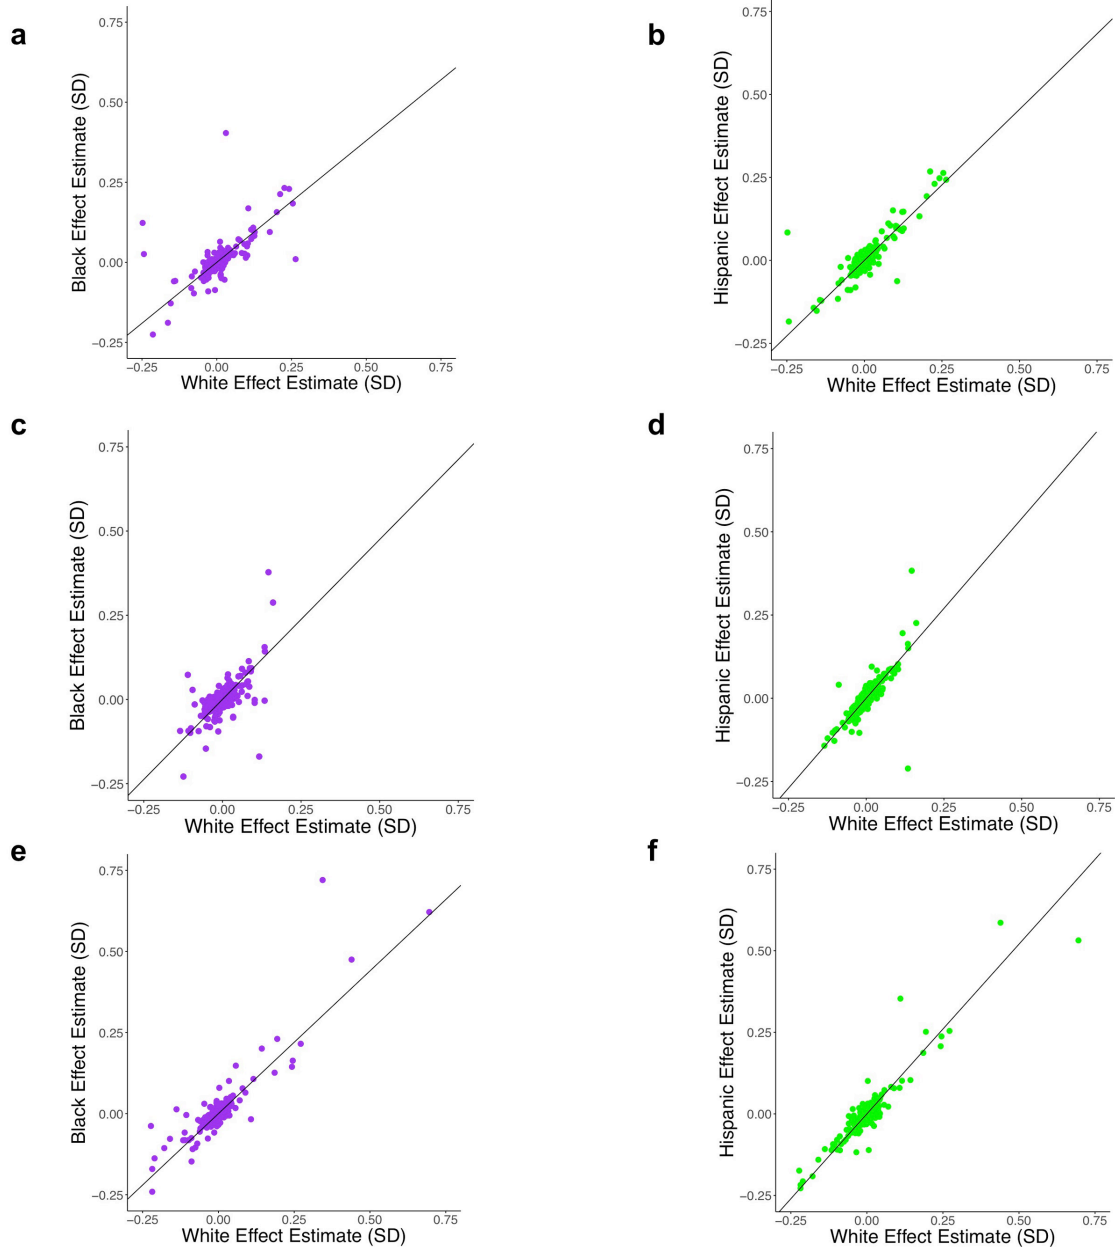

**Supplementary Figure 7**

**Representative comparison of 354 independent lipid variants common to all ethnicities for triglycerides, total cholesterol, and HDL-C**

**a,b)** Effect estimates for association with triglycerides in white individuals (n=211,491; x-axes) compared to black (**a**, n=56,439;  $\beta = 0.76$ ) or Hispanic (**b**, n=24,063;  $\beta = 0.91$ ) individuals.

**c,d)** Effect estimates for total cholesterol association in white individuals (n=215,551; x-axes) compared to black (**c**, n=57,332;  $\beta = 0.95$ ) or Hispanic (**d**, n=24,743;  $\beta = 1.08$ ) individuals.

**e,f)** Effect estimates for HDL-C association in white individuals (n=210,967; x-axes) compared to black (**e**, n=56,833;  $\beta = 0.88$ ) or Hispanic (**f**, n=23,946;  $\beta = 1.04$ ) individuals.



Abbreviations: SD, Standard Deviations; HDL-C, High-Density Lipoprotein Cholesterol

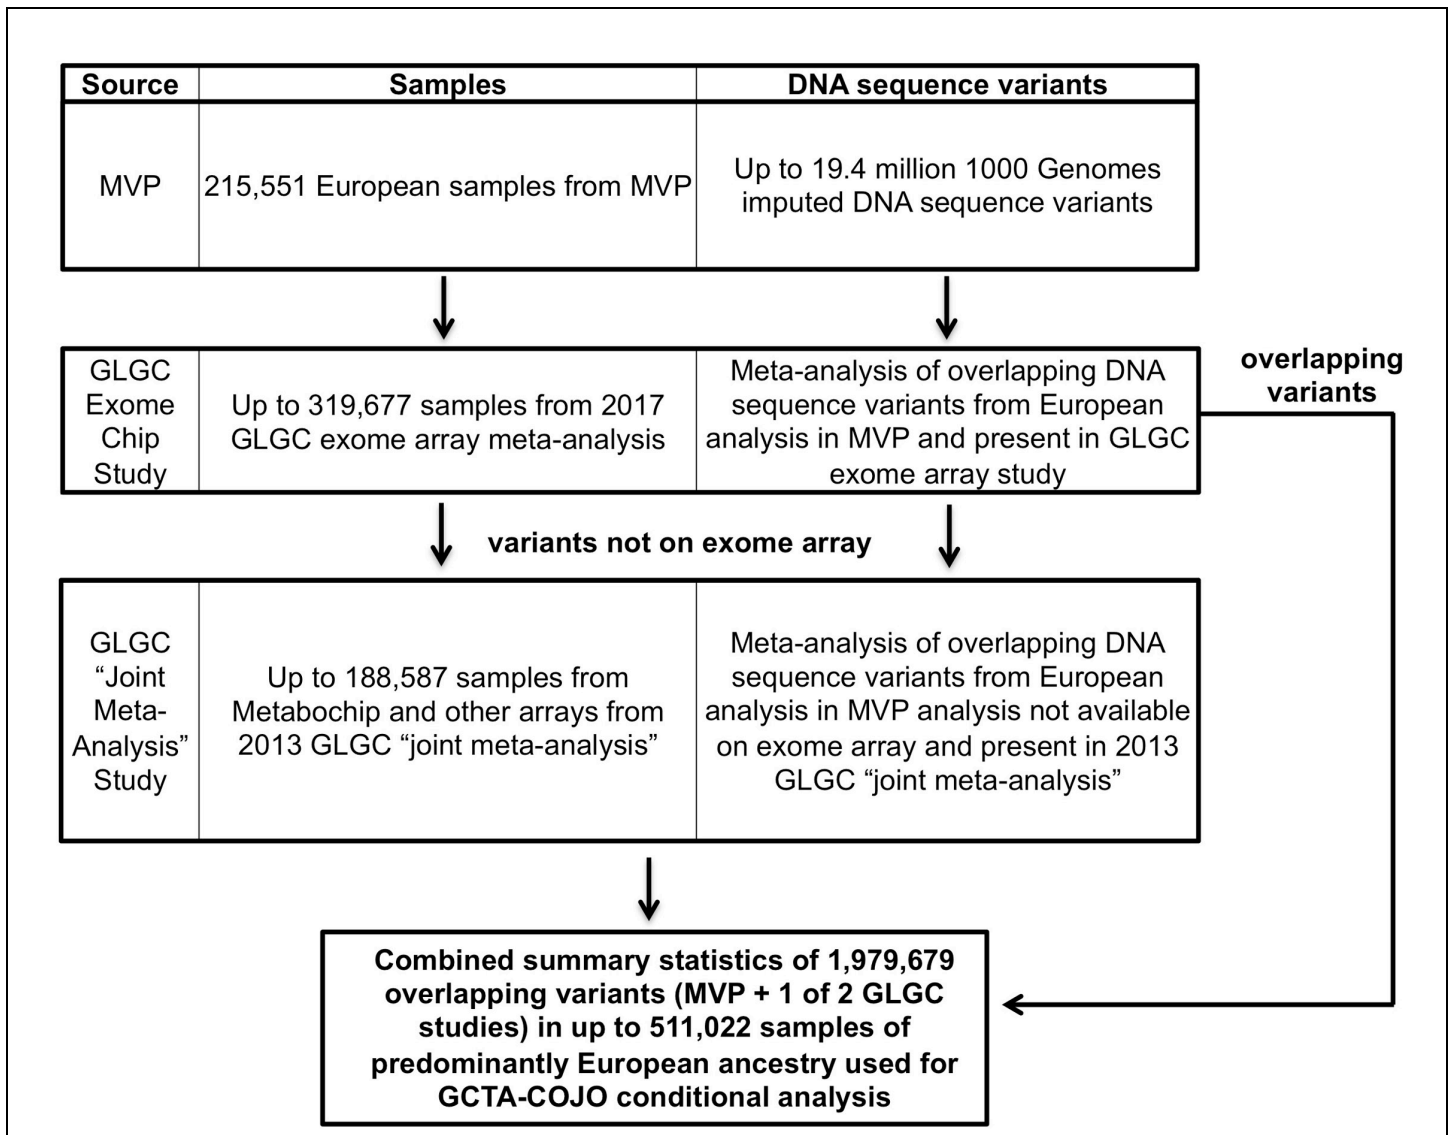

**Supplementary Figure 8**

**Design of lipids stepwise conditional analysis**

Flow chart for generation of summary statistics used in GCTA-COJO approximate stepwise conditional analysis. The GCTA-COJO software requires GWAS summary statistics and an LD-matrix of a representative group of samples with similar genetic ancestry to those used for the GWAS. As such, summary statistics were combined from MVP (European ancestry subgroup), the GLGC 2017 exome chip analysis (predominantly European ancestry) and the GLGC 2013 "joint meta-analysis" (predominantly European ancestry) via an inverse-variance weight fixed effects meta-analysis. These combined results were then used with an LD-matrix of 10,000 randomly selected European samples from the UK Biobank interim release<sup>6</sup> for GCTA-COJO stepwise conditional analysis.

Abbreviations: MVP, Million Veteran Program; GLGC, Global Lipids Genetics Consortium



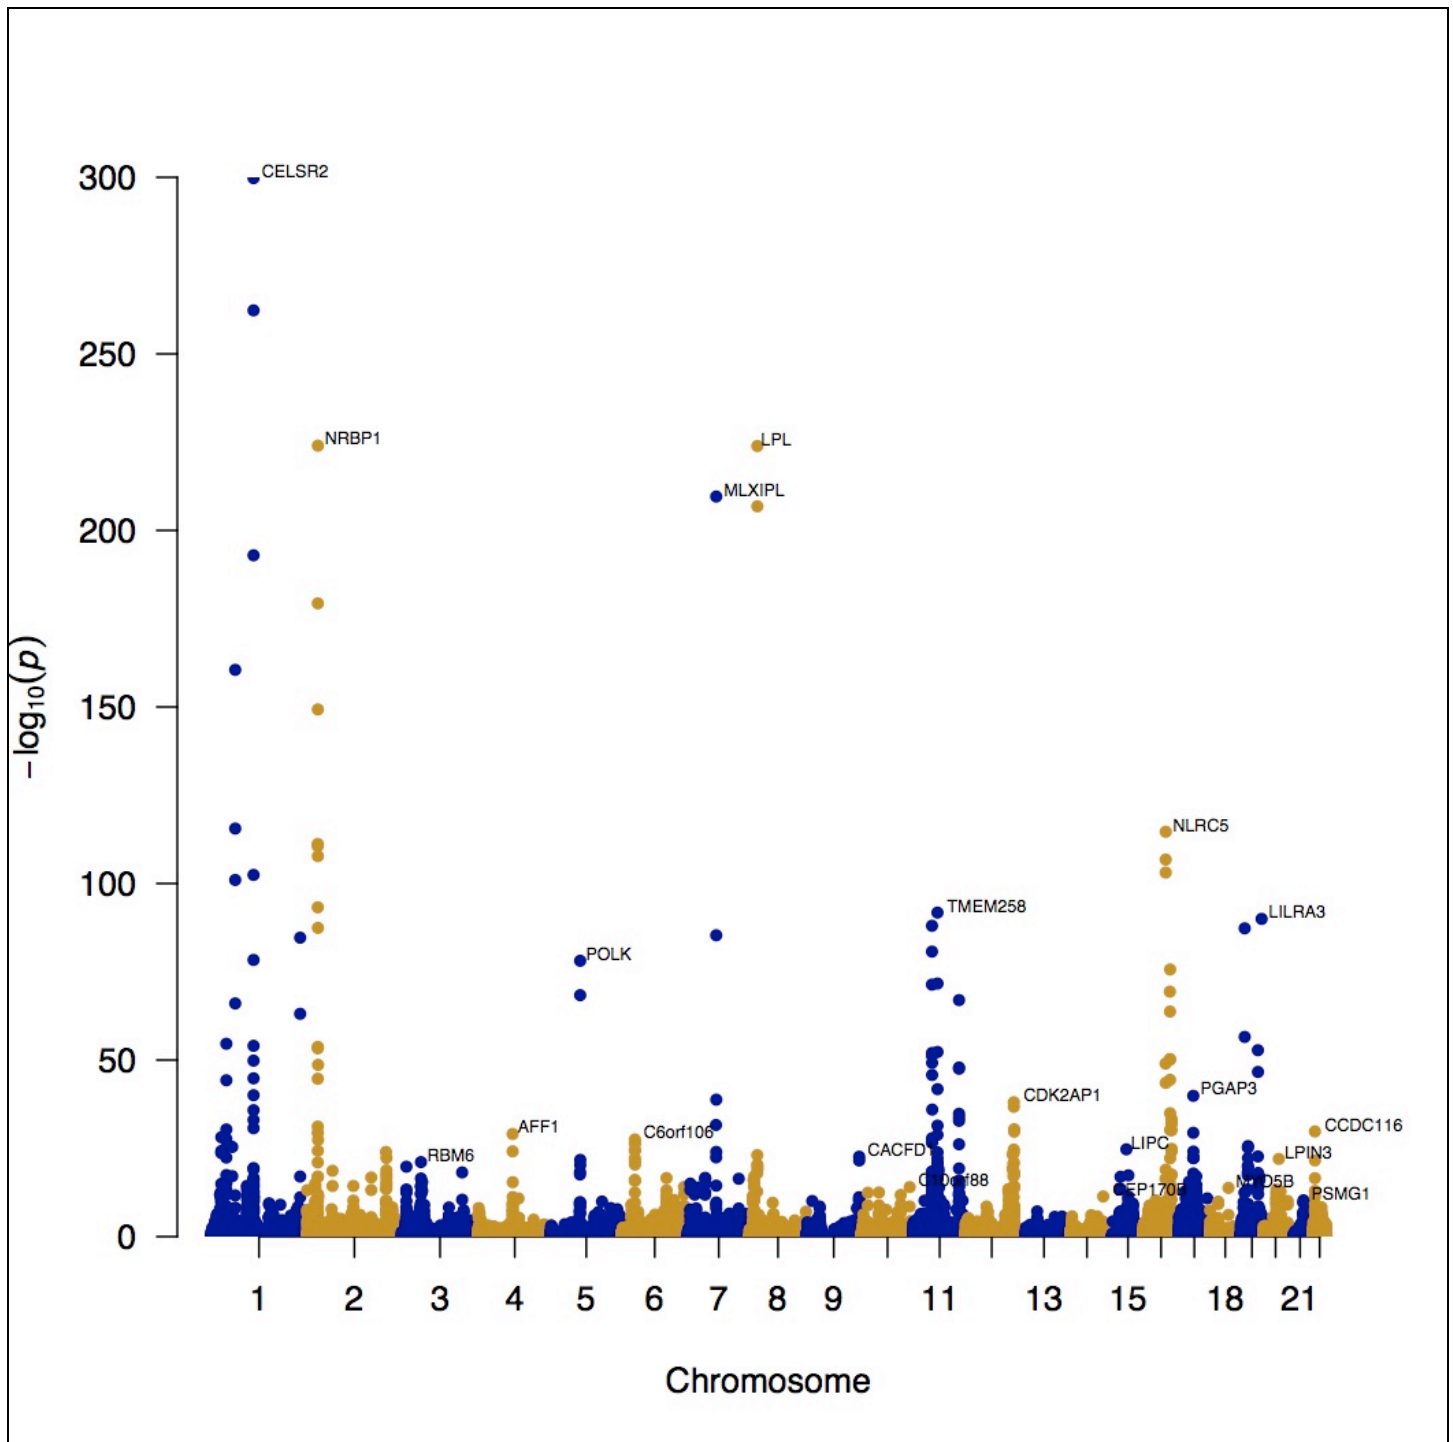

**Supplementary Figure 9**

**Manhattan plot for the lipids Transcriptome-wide association study (TWAS) using MVP and GLGC combined summary statistics**

Plot of  $-\log_{10}(P)$  [two-sided] for lipid-gene associations by chromosomal position for all genes analyzed in the TWAS analysis in up to 511,022 European samples in MVP and GLGC. The genes nearest to the top associated variants are displayed.

Abbreviations: MVP, Million Veteran Program; GLGC, Global Lipids Genetics Consortium

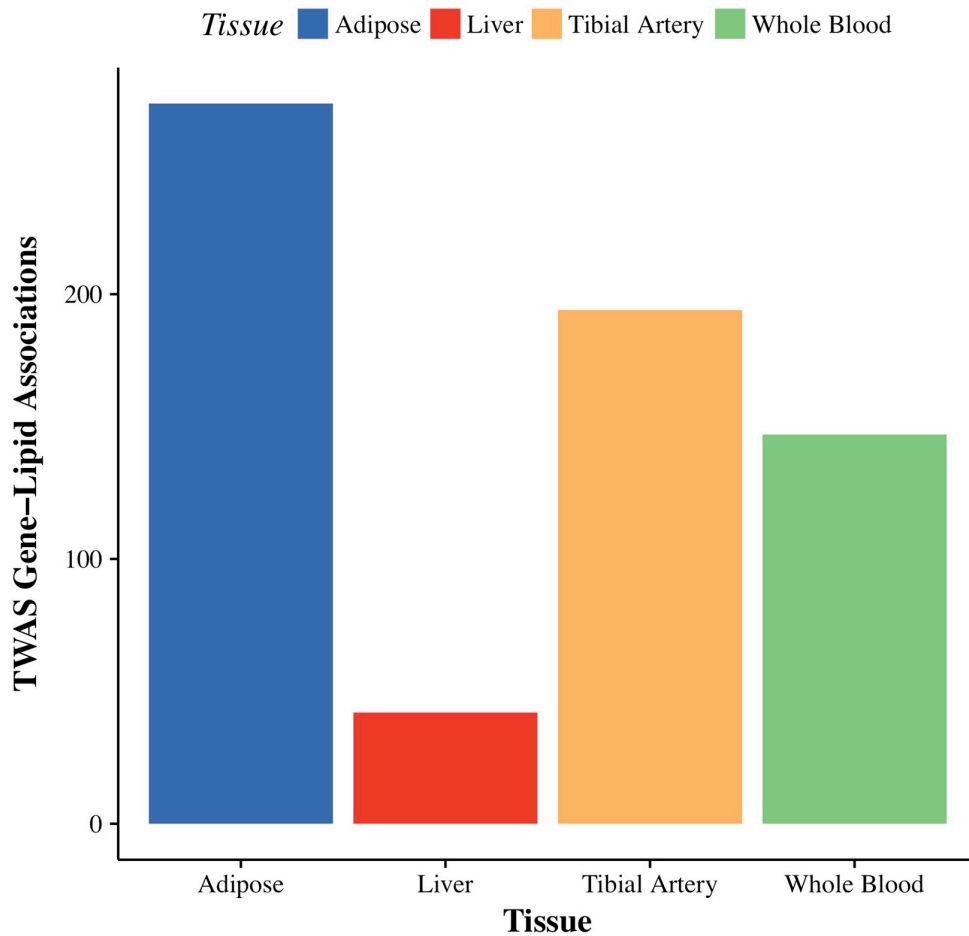

**Supplementary Figure 10**

**Transcriptome-wide association study (TWAS) results for lipids by tissue**

Graph of the 655 genome-wide (two-sided TWAS  $P < 5 \times 10^{-8}$ ) gene-lipid associations for each of four tissues (adipose, liver, tibial artery, and whole blood) resulting from the lipids TWAS analysis in up to 511,022 European samples in MVP and GLGC.

Abbreviations: MVP, Million Veteran Program; GLGC, Global Lipids Genetics Consortium

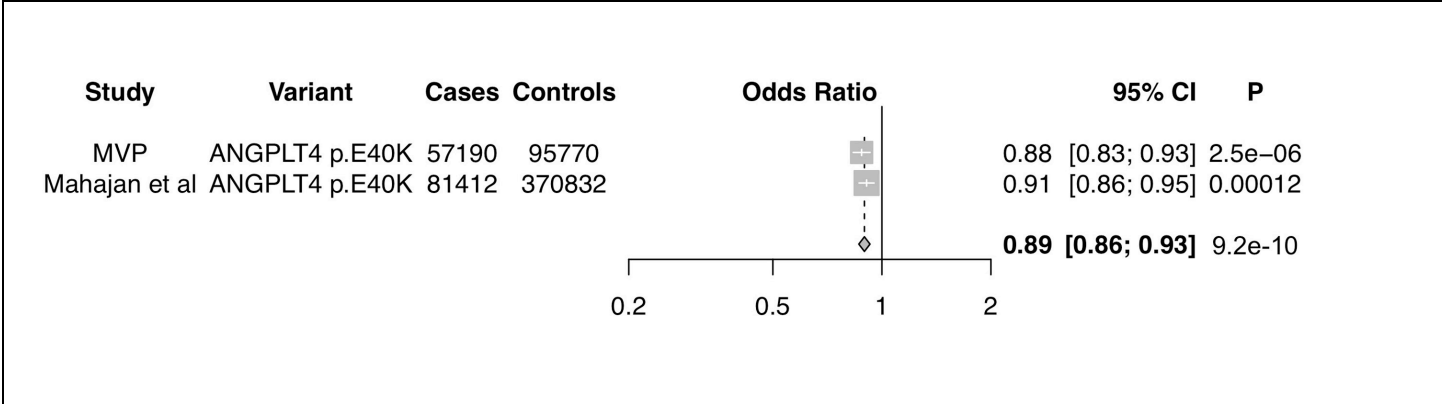

**Supplementary Figure 11**

**ANGPTL4 40Lys carrier association with type 2 diabetes**

Independent replication of the *ANGPTL4* p.Glu40Lys association with type 2 diabetes in the recently published meta-analysis by Mahajan et al<sup>7</sup>. Results for the body mass index (BMI) unadjusted logistic regression analysis are displayed with two-sided P values.

Abbreviations: MVP, Million Veteran Program

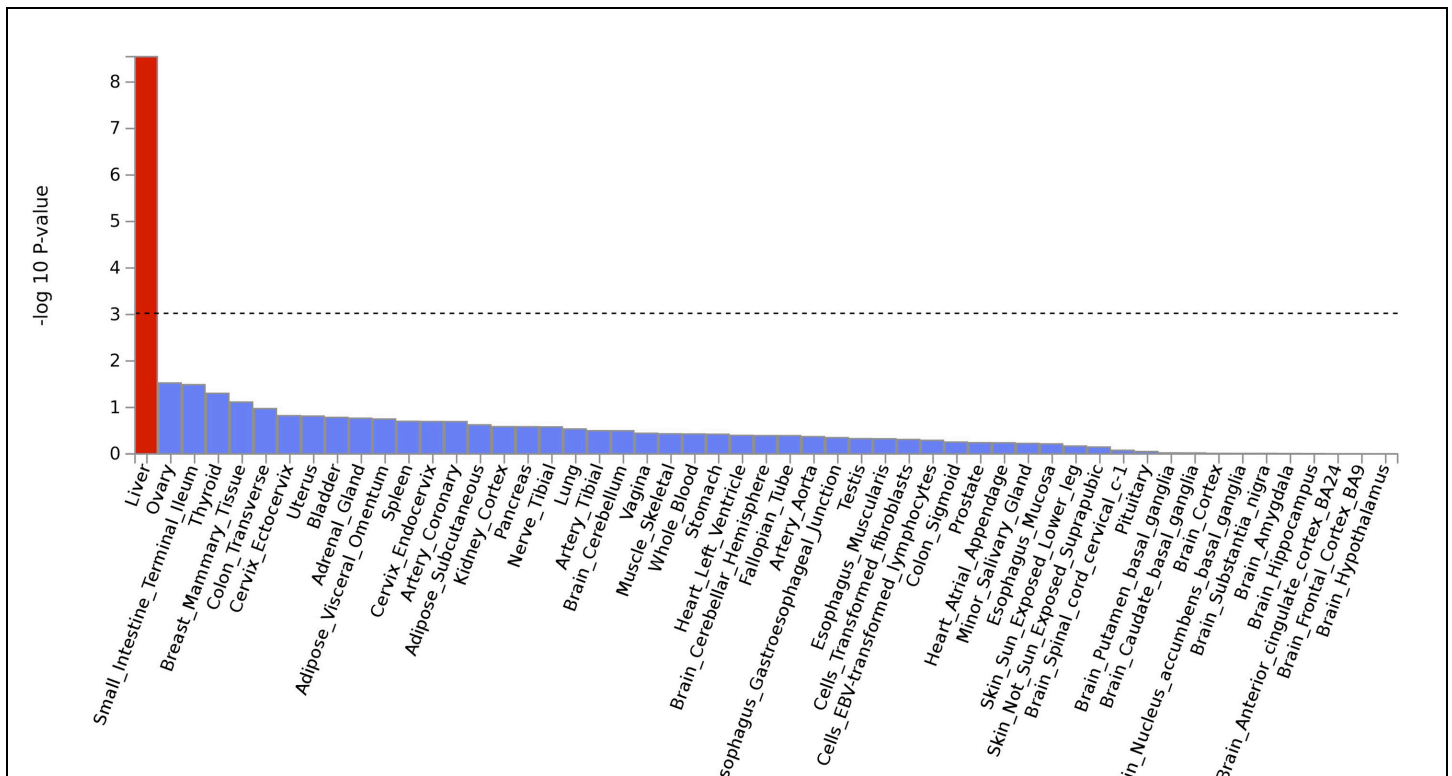

**Supplementary Figure 12**

**Multi-ethnic LDL-C MAGMA gene-property analysis of the expression of genes in 53 tissues included in GTEx**

MAGMA<sup>8</sup> tissue expression profile analysis results as performed using the FUMA pipeline<sup>9</sup> for LDL-C in a multi-ethnic Stage 1 meta-analysis of MVP participants (n=297,218). Tissues with a Bonferroni corrected P < 0.05 for a two-sided Student's t-test are highlighted in red.

Abbreviations: GTEx, Genotype-Tissue Expression Project; MAGMA, Multi-marker Analysis of GenoMic Annotation; MVP, Million Veteran Program; LDL-C, Low-Density Lipoprotein Cholesterol

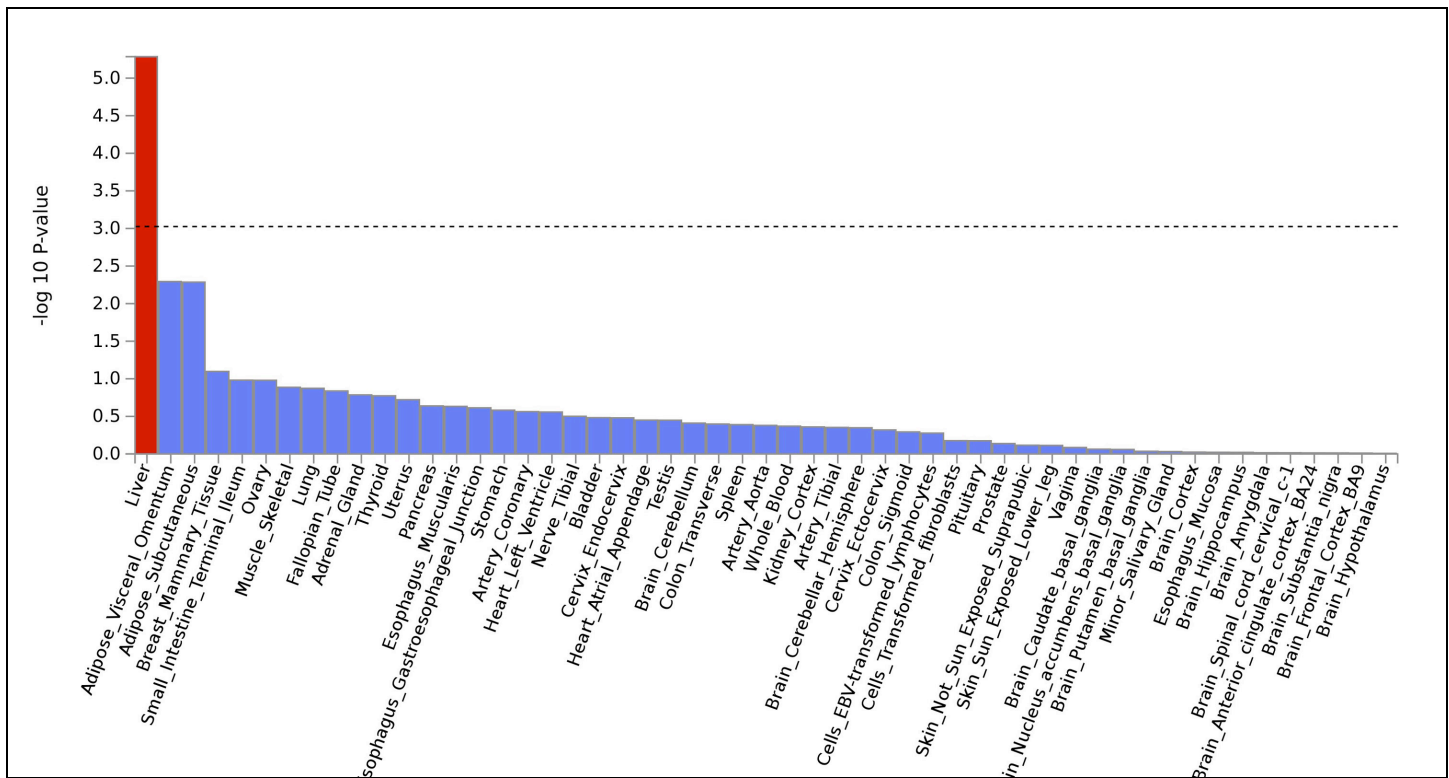

**Supplementary Figure 13**

**Multi-ethnic HDL-C MAGMA gene-property analysis of the expression of genes in 53 tissues included in GTEx**

MAGMA<sup>8</sup> tissue expression profile analysis results as performed using the FUMA pipeline<sup>9</sup> for HDL-C in a multi-ethnic Stage 1 meta-analysis of MVP participants (n=291,746). Tissues with a Bonferroni corrected P < 0.05 for a two-sided Student's t-test are highlighted in red.

Abbreviations: GTEx, Genotype-Tissue Expression Project; MAGMA, Multi-marker Analysis of GenoMic Annotation; MVP, Million Veteran Program; HDL-C, High-Density Lipoprotein Cholesterol



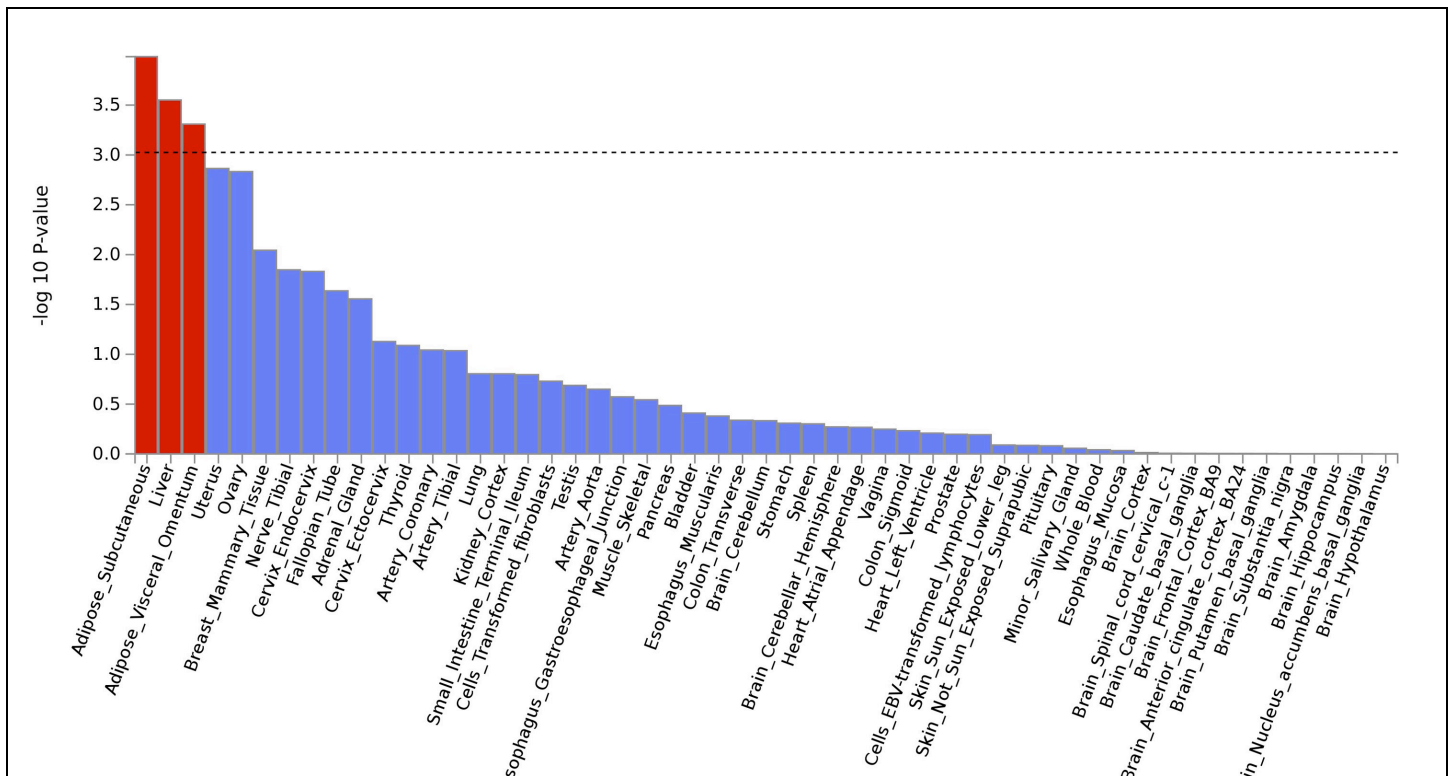

**Supplementary Figure 14**

**Multi-ethnic triglycerides MAGMA gene-property analysis of the expression of genes in 53 tissues included in GTEx**

MAGMA<sup>8</sup> tissue expression profile analysis results as performed using the FUMA pipeline<sup>9</sup> for triglycerides in a multi-ethnic Stage 1 meta-analysis of MVP participants (n=291,993). Tissues with a Bonferroni corrected P < 0.05 for a two-sided Student's t-test are highlighted in red.

Abbreviations: GTEx, Genotype-Tissue Expression Project; MAGMA, Multi-marker Analysis of GenoMic Annotation; MVP, Million Veteran Program

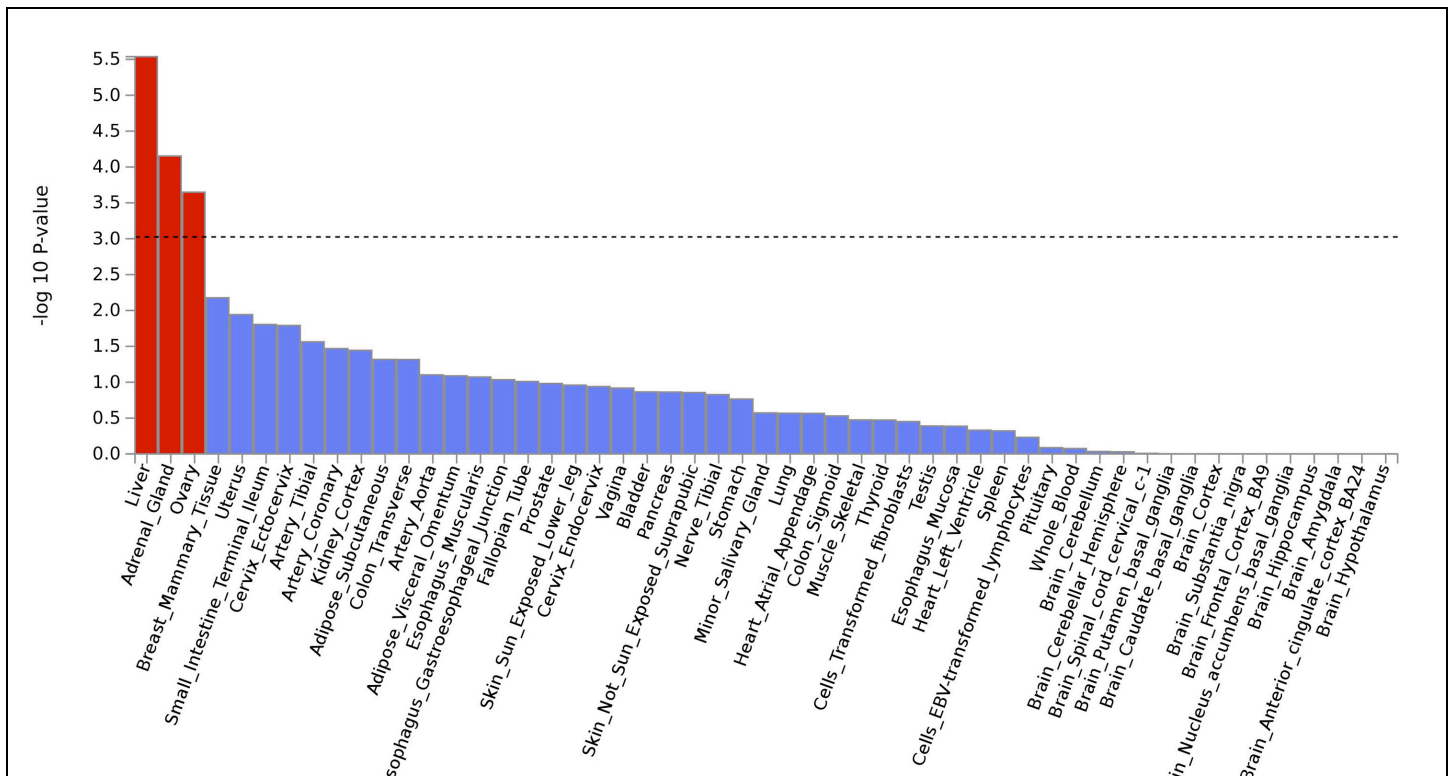

**Supplementary Figure 15**

**European only LDL-C MAGMA gene-property analysis of the expression of genes in 53 tissues included in GTEx**

MAGMA<sup>8</sup> tissue expression profile analysis results as performed using the FUMA pipeline<sup>9</sup> for LDL-C in MVP participants of European ancestry alone (n=215,196). Tissues with a Bonferroni corrected P < 0.05 for a two-sided Student's t-test are highlighted in red.

Abbreviations: GTEx, Genotype-Tissue Expression Project; MAGMA, Multi-marker Analysis of GenoMic Annotation; MVP, Million Veteran Program; LDL-C, Low-Density Lipoprotein Cholesterol

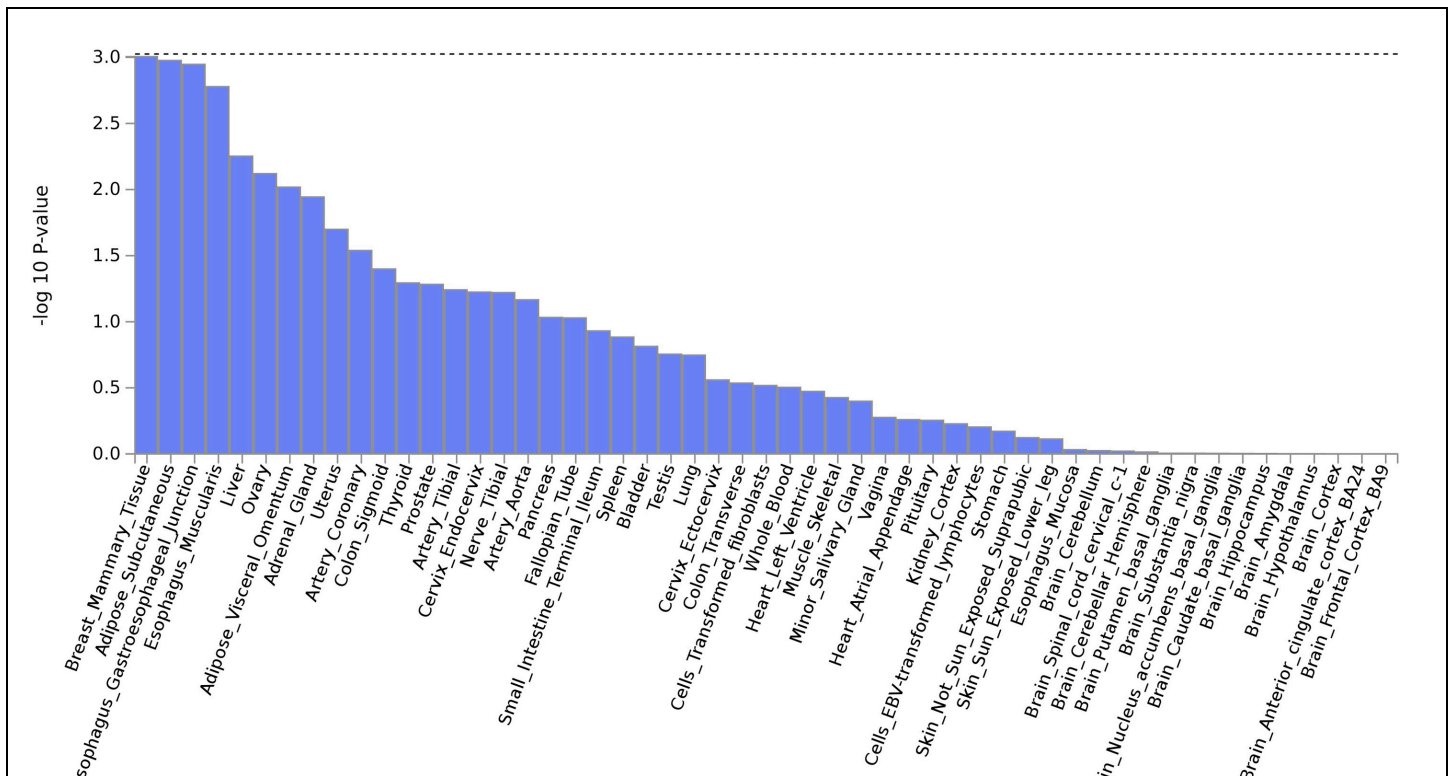

**Supplementary Figure 16**

**European only HDL-C MAGMA gene-property analysis of the expression of genes in 53 tissues included in GTEx**

MAGMA<sup>8</sup> tissue expression profile analysis results as performed using the FUMA pipeline<sup>9</sup> for HDL-C in MVP participants of European ancestry alone (n=210,967). Tissues with a Bonferroni corrected P < 0.05 for a two-sided Student's t-test are highlighted in red.

Abbreviations: GTEx, Genotype-Tissue Expression Project; MAGMA, Multi-marker Analysis of GenoMic Annotation; MVP, Million Veteran Program; HDL-C, High-Density Lipoprotein Cholesterol

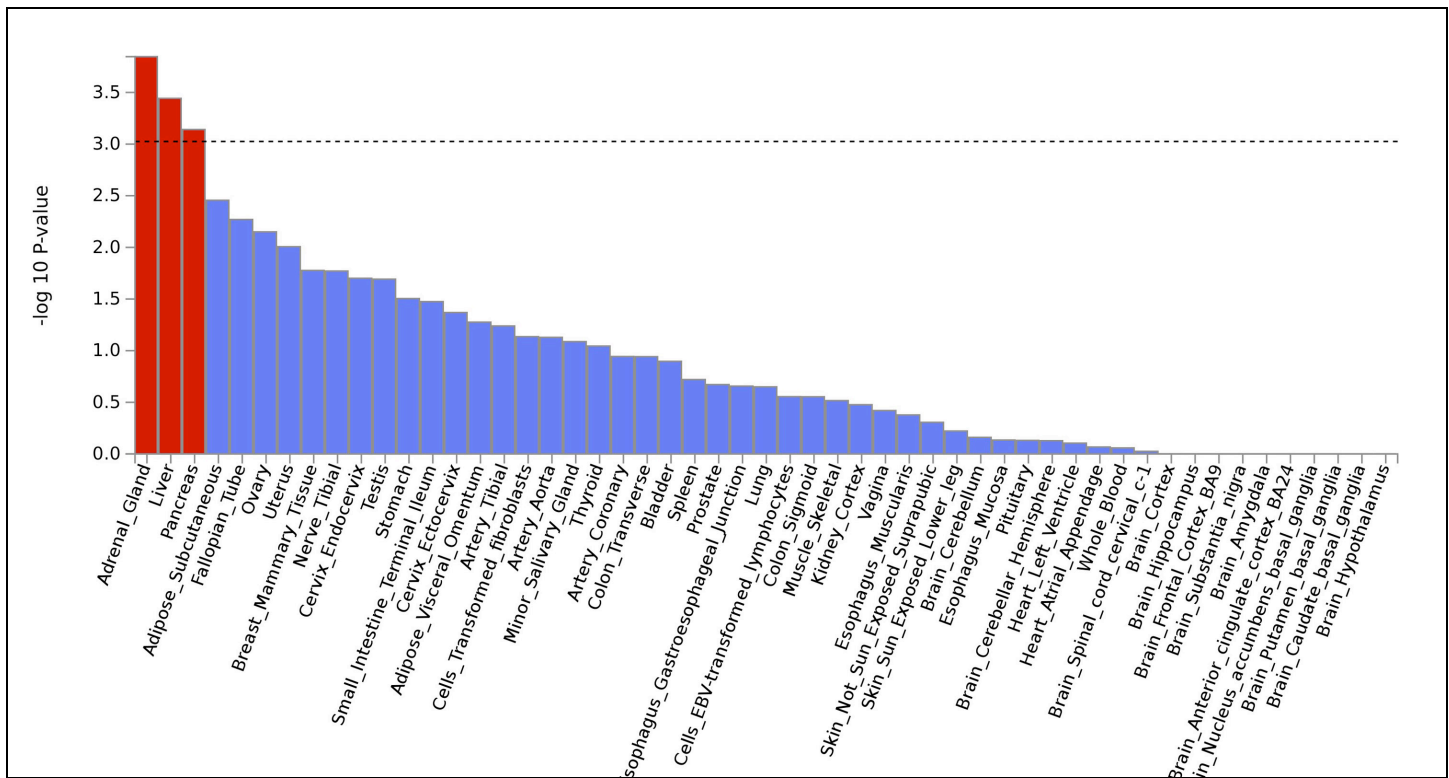

**Supplementary Figure 17**

**European only triglycerides MAGMA gene-property analysis of the expression of genes in 53 tissues included in GTEx**

MAGMA<sup>8</sup> tissue expression profile analysis results as performed using the FUMA pipeline<sup>9</sup> for triglycerides in MVP participants of European ancestry alone (n=211,491). Tissues with a Bonferroni corrected P < 0.05 for a two-sided Student's t-test are highlighted in red.

Abbreviations: GTEx, Genotype-Tissue Expression Project; MAGMA, Multi-marker Analysis of GenoMic Annotation; MVP, Million Veteran Program

#### Supplementary Figure References:

1. Alexander, D.H., Novembre, J. & Lange, K. Fast model-based estimation of ancestry in unrelated individuals. *Genome Res* **19**, 1655-64 (2009).
2. The 1000 Genomes Project Consortium. A global reference for human genetic variation. *Nature* **526**, 68-74 (2015).
3. Liu, D.J. *et al.* Exome-wide association study of plasma lipids in >300,000 individuals. *Nat Genet* (2017).
4. Yang, J. *et al.* Genomic inflation factors under polygenic inheritance. *Eur J Hum Genet* **19**, 807-12 (2011).
5. Wood, A.R. *et al.* Defining the role of common variation in the genomic and biological architecture of adult human height. *Nat Genet* **46**, 1173-86 (2014).
6. UK Biobank Analysis Team. UK Biobank genotype collections and QC on 150k participants, April 2014. [http://www.ukbiobank.ac.uk/wp-content/uploads/2014/04/UKBiobank\\_genotyping\\_QC\\_documentation-web.pdf](http://www.ukbiobank.ac.uk/wp-content/uploads/2014/04/UKBiobank_genotyping_QC_documentation-web.pdf). (Accessed September 16, 2015).
7. Mahajan, A. *et al.* Refining the accuracy of validated target identification through coding variant fine-mapping in type 2 diabetes. *Nat Genet* **50**, 559-571 (2018).
8. de Leeuw, C.A., Mooij, J.M., Heskes, T. & Posthuma, D. MAGMA: generalized gene-set analysis of GWAS data. *PLoS Comput Biol* **11**, e1004219 (2015).
9. Watanabe, K., Taskesen, E., van Bochoven, A. & Posthuma, D. Functional mapping and annotation of genetic associations with FUMA. *Nat Commun* **8**, 1826 (2017).
